# Supplementary material for: Silver(i) catalyzed intramolecular cyclization of N-(2-(alk-1-yn-1-yl))-1H-tetrazoles leading to the formation of N-cyano-2-substituted indoles under ambient conditions
Source: Royal Society of Chemistry journal article supplement (doi:10.1039/c7qo00109f), 2017-01-01
Supplement: c7qo00109f1.pdf [file c7qo00109f1.pdf]

## **Supporting Information**

# **Silver(I) Catalyzed Intramolecular Cyclization of N-(2-(alk-1-yn-1-yl))Tetrazoles leading to the formation of N-cyano-2-substituted Indoles under ambient conditions**

Sangeetha Panaka,<sup>a, b</sup> Rajiv Trivedi,<sup>a, b\*</sup> T. Sony,<sup>c</sup> S. Prabhakar,<sup>c</sup> L. Raju Chowhan<sup>d</sup>

<sup>a</sup>*Inorganic and Physical Chemistry Division, CSIR-Indian Institute of Chemical Technology, Hyderabad 500007, Telangana, India, [trivedi@iict.res.in](mailto:trivedi@iict.res.in), Fax: +91-40-2716-0921; Tel: +91-40-2719-1667*

<sup>b</sup>*Academy of Scientific and Innovative Research, AcSIR CSIR-IICT Campus, Hyderabad, 500007*

<sup>c</sup>*Analytical Chemistry and Mass spectrometry Division, CSIR-Indian Institute of Chemical Technology, Hyderabad 500007, Telangana, India*

<sup>d</sup>*School of Chemical Sciences, Central University of Gujarat, Sector 30, Gandhinagar, Gujarat - 382030, India*

### **Table of content:**

|          |                                     |       |
|----------|-------------------------------------|-------|
| <b>1</b> | IR Spectrum of compounds (4aa- 4ee) | 2- 33 |
|----------|-------------------------------------|-------|

# IR Spectrum of Compounds (4aa-4ee)

## Indian Institute of Chemical Technology, Hyderabad FT-IR Analysis Report

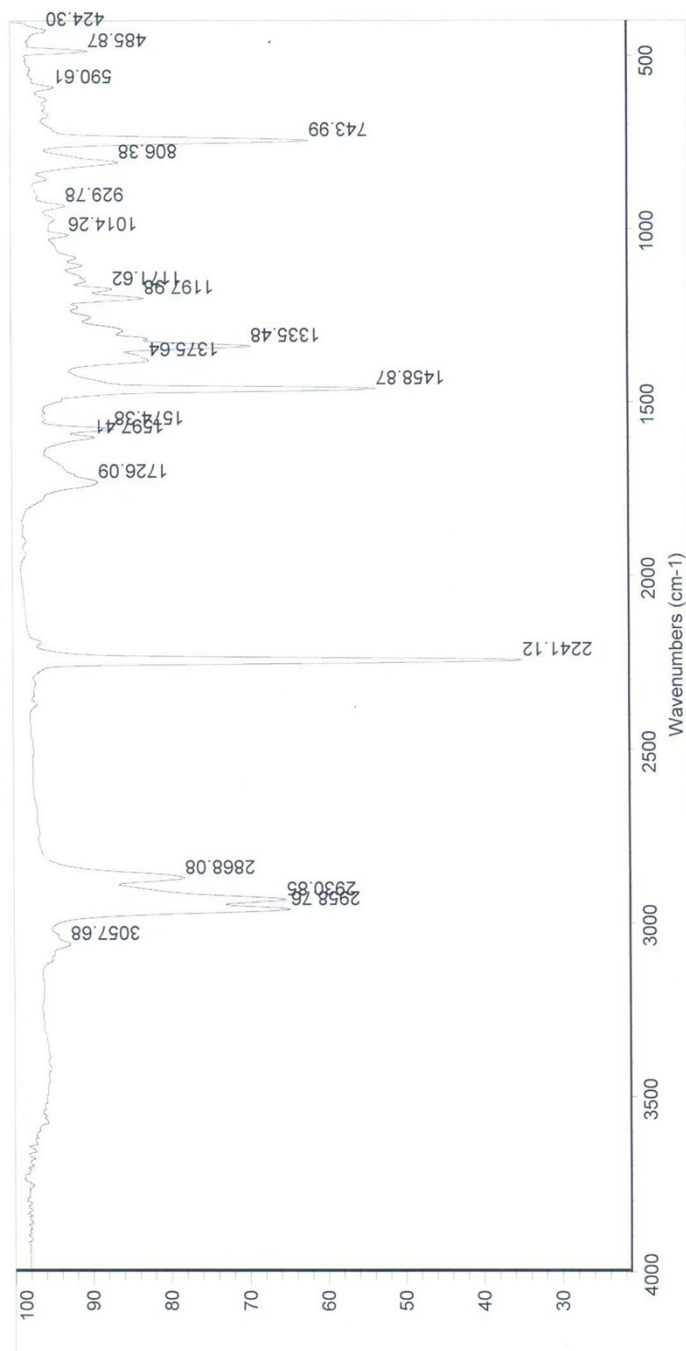

Sample Name: RT-HEXPD [NEAT]

Sample Preparation:

Collection time: Thu Mar 09 15:34:20 2017 (GMT+05:30)

Bench: Thermo Nicolet Nexus 670 Spectrometer

Resolution: 4cm<sup>-1</sup>

Detector: DTGS KB

Beamsplitter: KBr

Source: IR

Analyst Name:

IR Spectrum of 4ba

Indian Institute of Chemical Technology, Hyderabad  
FT-IR Analysis Report

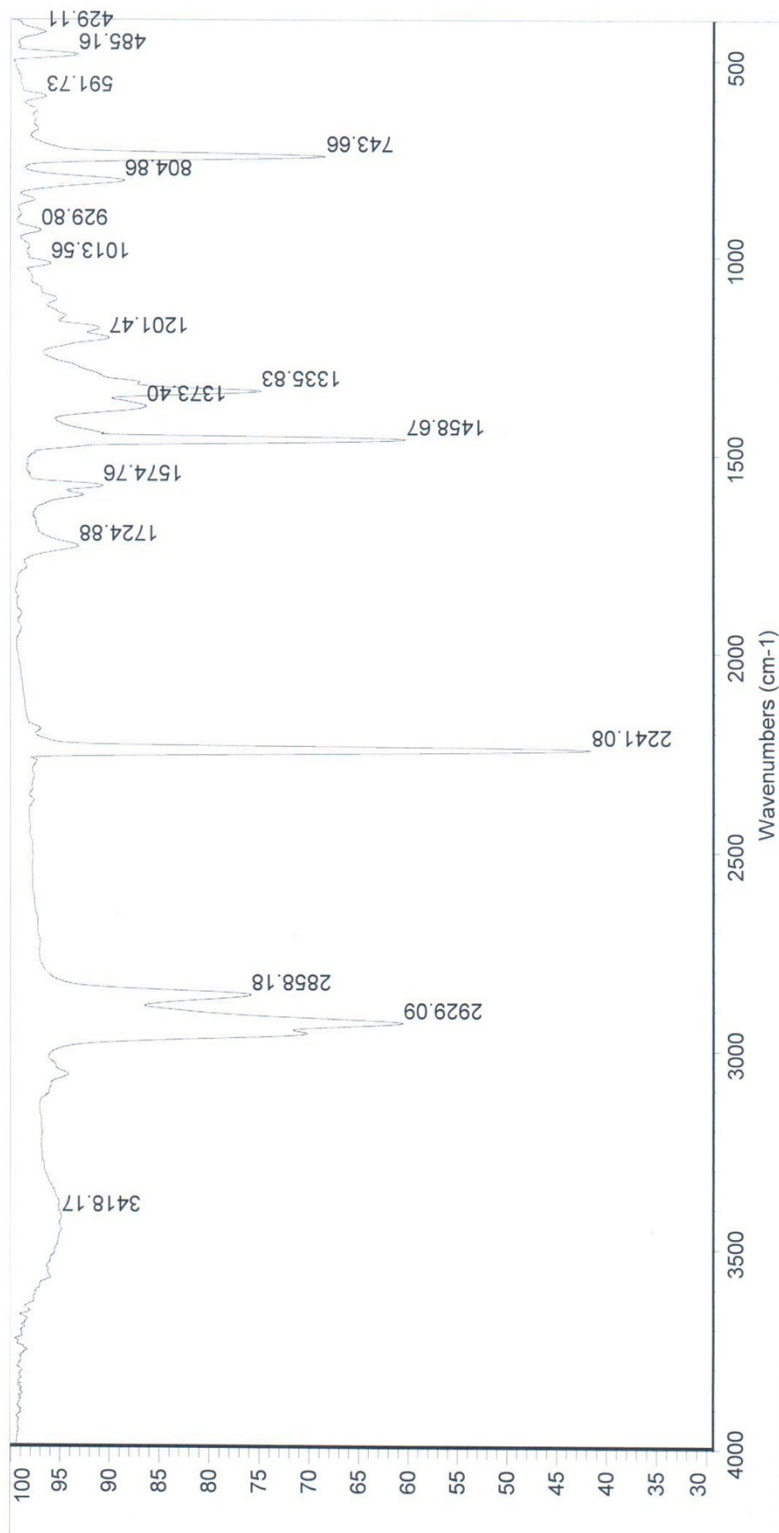

Sample Name: PRL-OCT [NEAT]

Sample Preparation:

Collection time: Mon Mar 06 11:37:24 2017 (GMT+05:30)

Bench: Thermo Nicolet Nexus 670 Spectrometer

Resolution: 4cm-1

Detector: DTGS KB

Beamsplitter: KBr

Source: IR

Analyst Name:

IR Spectrum of 4bb

Indian Institute of Chemical Technology, Hyderabad  
FT-IR Analysis Report

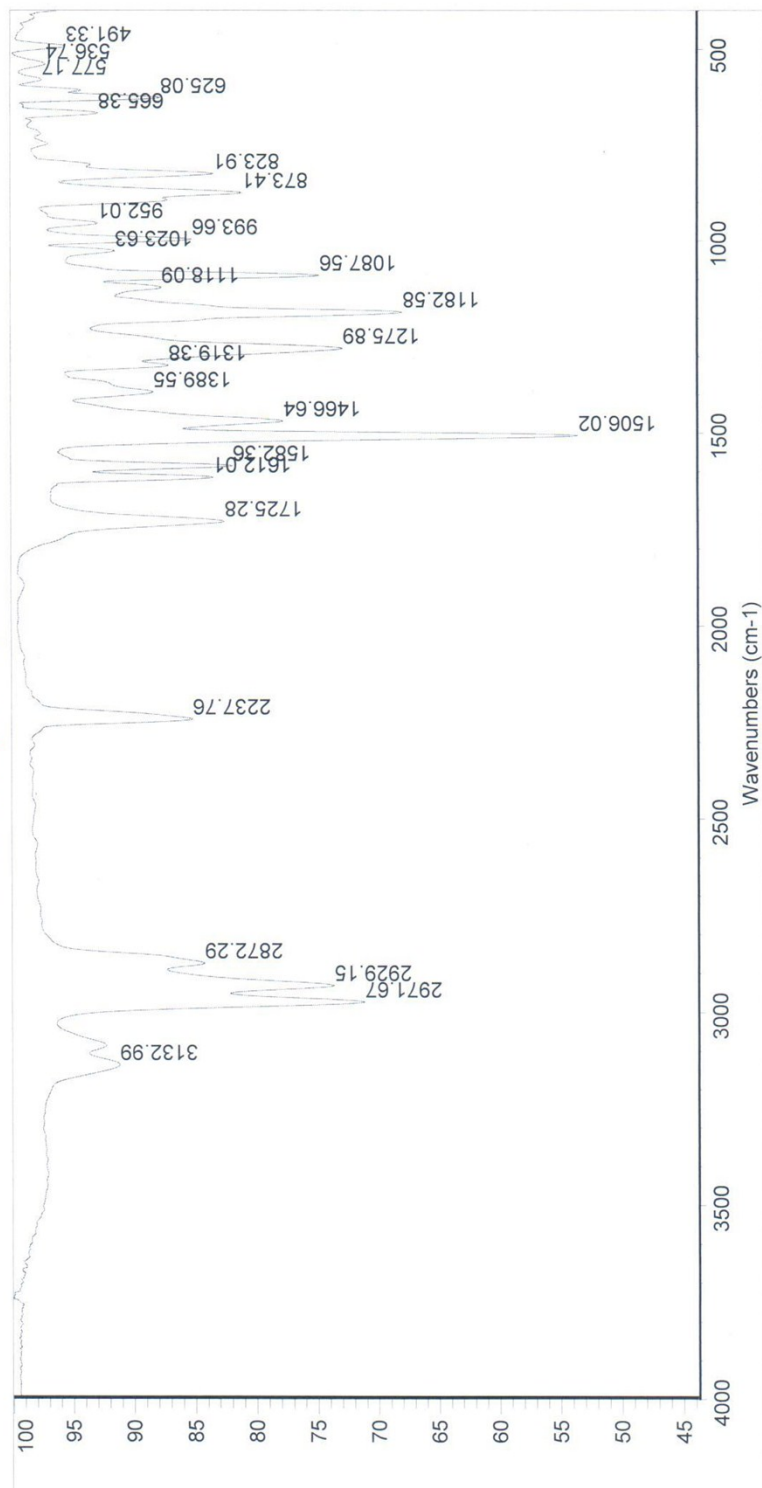

Sample Name: PRL-SEC [NEAT]

Sample Preparation:

Collection time: Fri Mar 03 15:04:50 2017 (GMT+05:30)

Bench: Thermo Nicolet Nexus 670 Spectrometer

Resolution: 4cm-1

Detector: DTGS KB

Beamsplitter: KBr

Source: IR

Analyst Name:

Spectrum of 4bc

Indian Institute of Chemical Technology, Hyderabad  
FT-IR Analysis Report

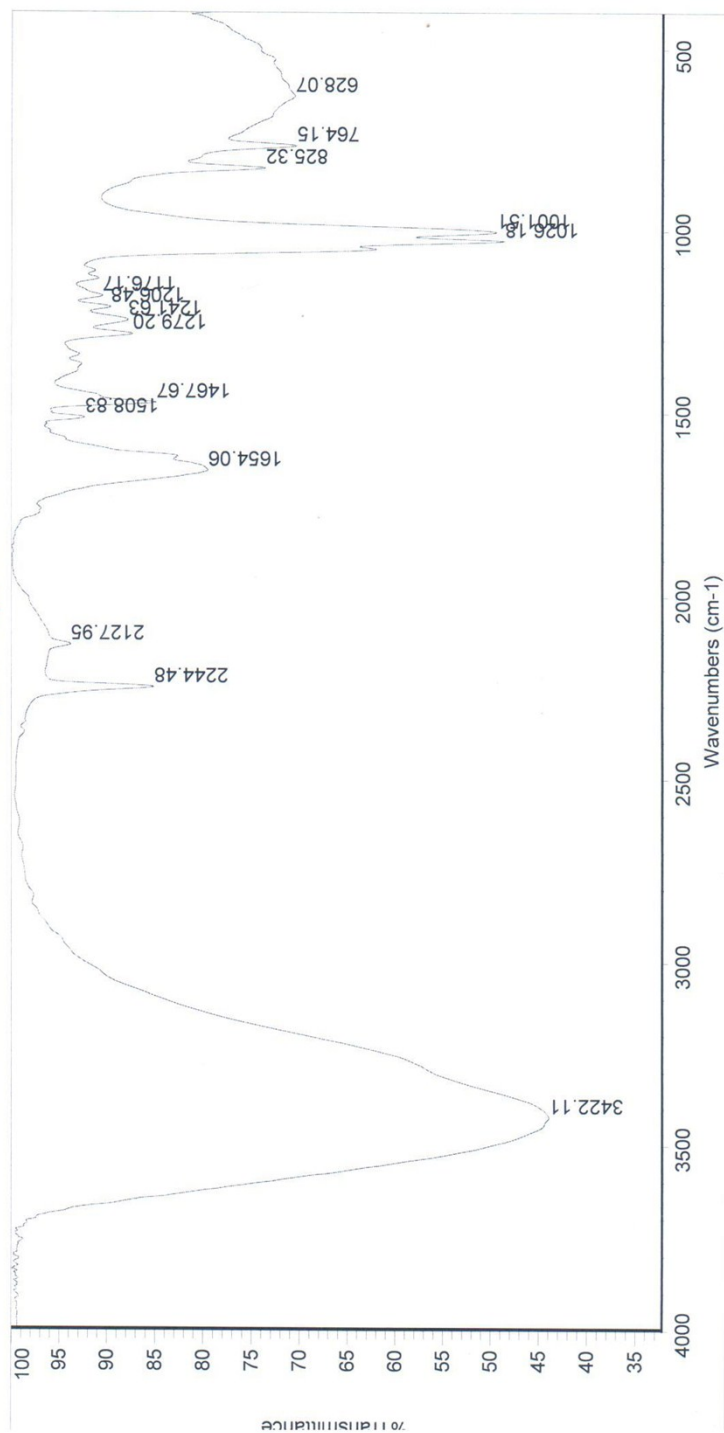

Sample Name: RT-FPOH [NEAT]

Sample Preparation:

Collection time: Mon Mar 06 12:23:03 2017 (GMT+05:30)

Bench: Thermo Nicolet Nexus 670 Spectrometer

Resolution: 4cm-1

Detector: DTGS-KB

Beamsplitter: KBr

Source: IR

Analyst Name:

IR Spectrum of 4aa

Indian Institute of Chemical Technology, Hyderabad  
FT-IR Analysis Report

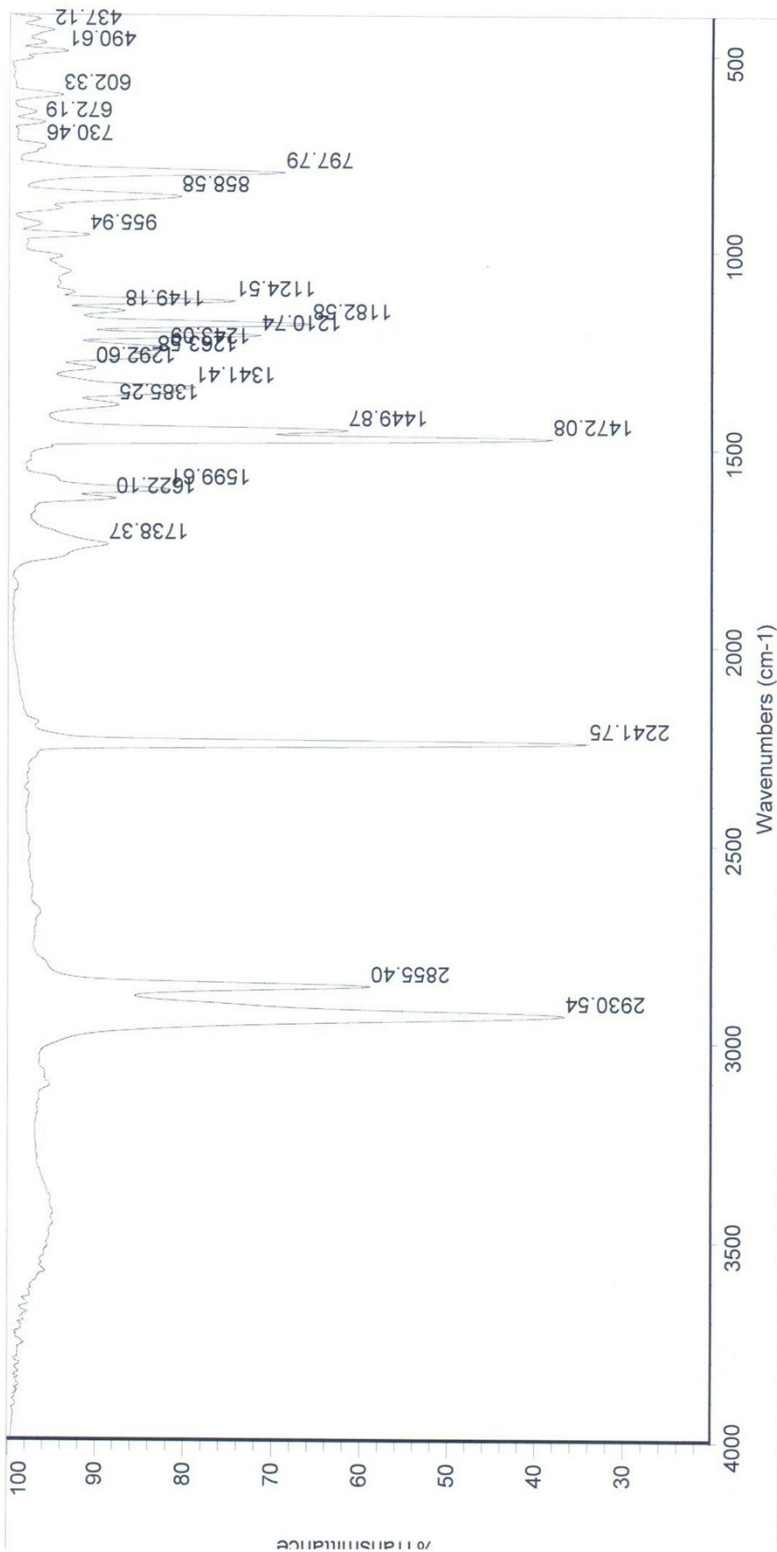

IR Spectrum of 4ae

Sample Name: RT-FCYH [NEAT]

Sample Preparation:

Collection time: Mon Mar 06 12:15:55 2017 (GMT+05:30)

Bench: Thermo Nicolet Nexus 670 Spectrometer

Resolution: 4cm<sup>-1</sup>

Detector: DTGS KB

Beamsplitter: KBr

Source: IR

Analyst Name:

Indian Institute of Chemical Technology, Hyderabad  
FT-IR Analysis Report

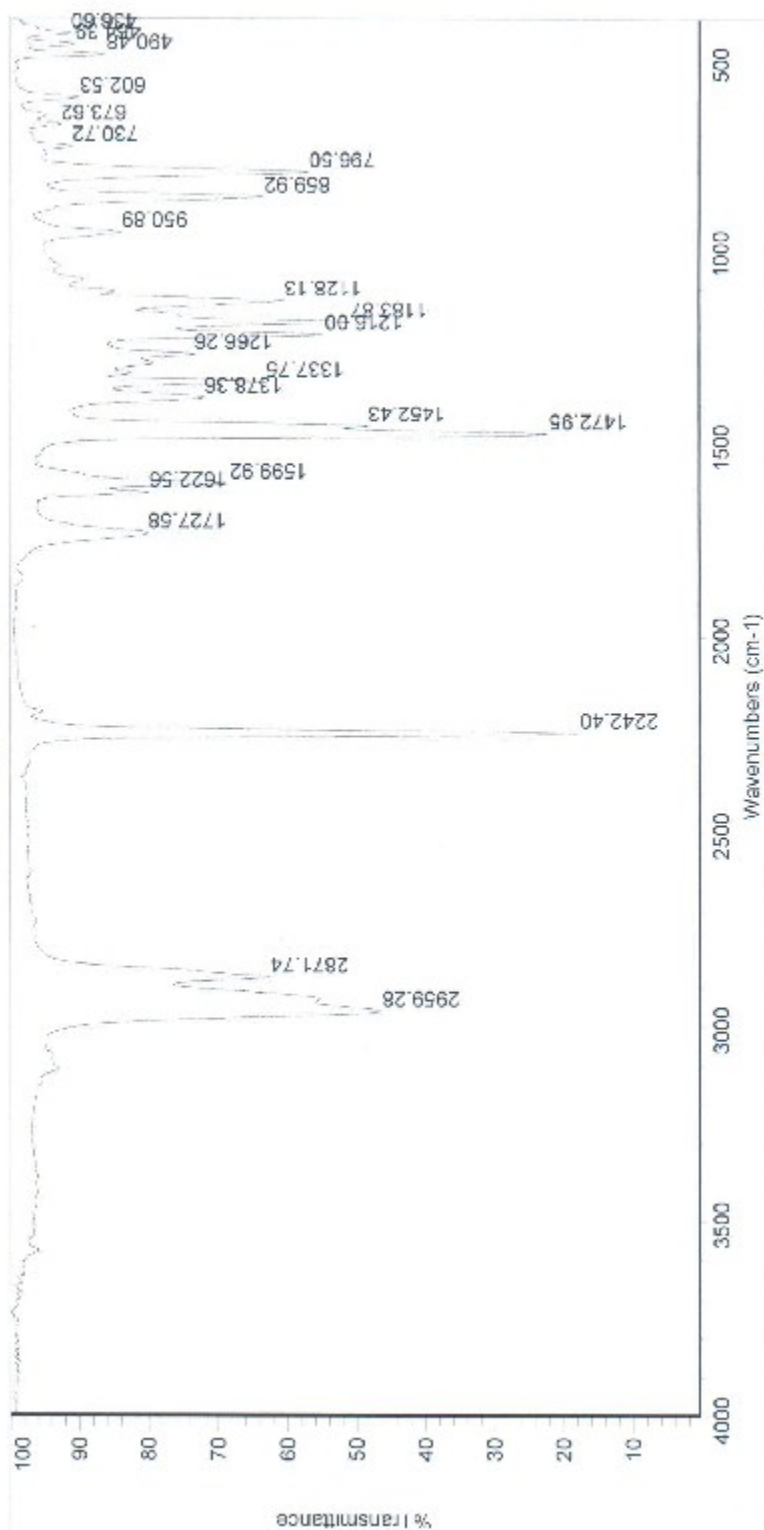

Sample Name: PRL-FCP [NEAT]

Sample Preparation:

Collection time: Tue Mar 07 15:58:42 2017 (GMT+05:30)

Bench: Thermo Nicolet Nexus 670 Spectrometer

Resolution: 4cm-1

Detector: DTGS KB

Beamsplitter: KBr

Source: IR

Analyst Name:

R Spectrum of 4af

Indian Institute of Chemical Technology, Hyderabad  
FT-IR Analysis Report

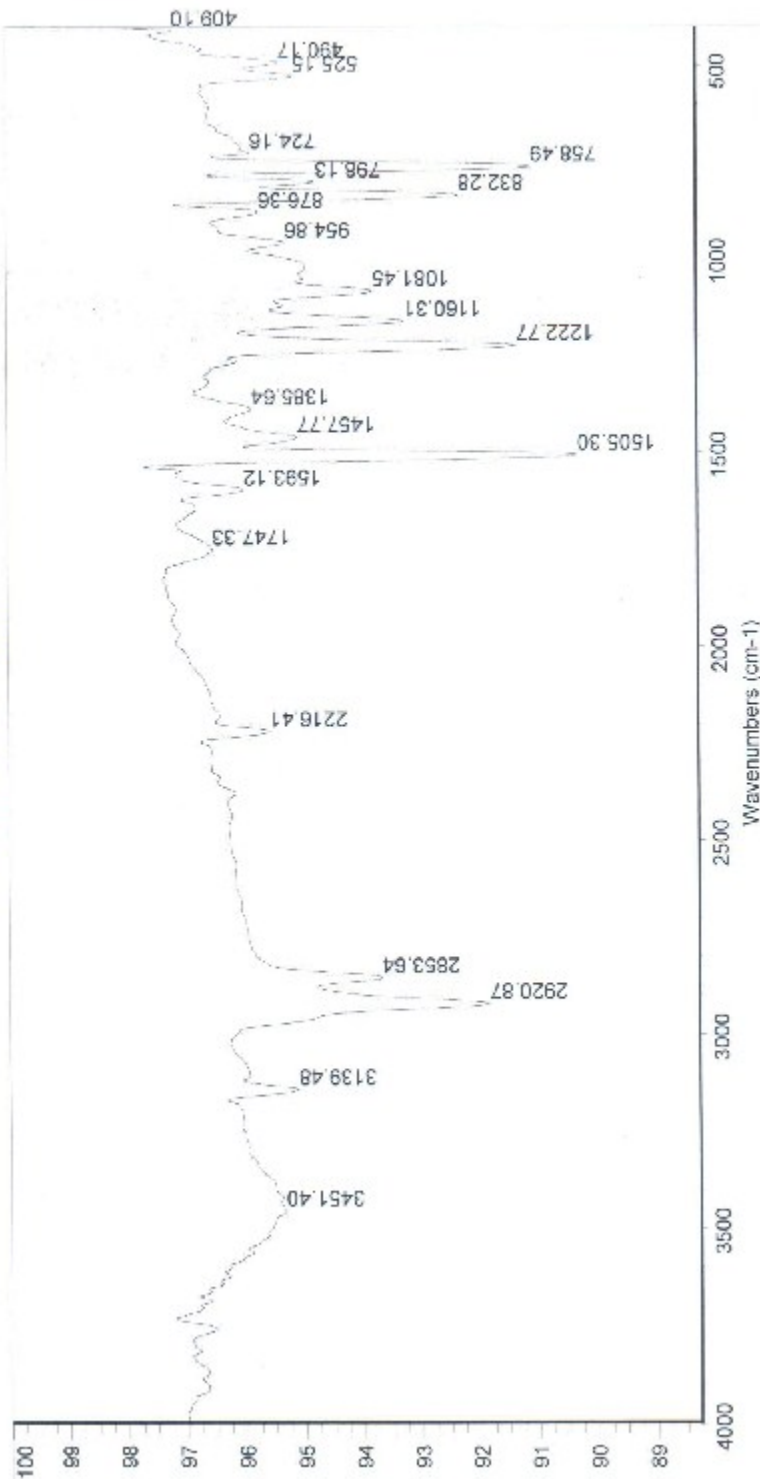

Sample Name: RT-FPH [NEAT]  
Sample Preparation:  
Collection time: Thu Mar 02 15:07:52 2017 (GMT+05:30)  
Bench: Thermo Nicolet Nexus 670 Spectrometer  
Resolution: 4cm-1  
Detector: DTGS-KB  
Beamsplitter: KBr  
Source: IR  
Analyst Name:

R Spectrum of 4ah



Indian Institute of Chemical Technology, Hyderabad  
FT-IR Analysis Report

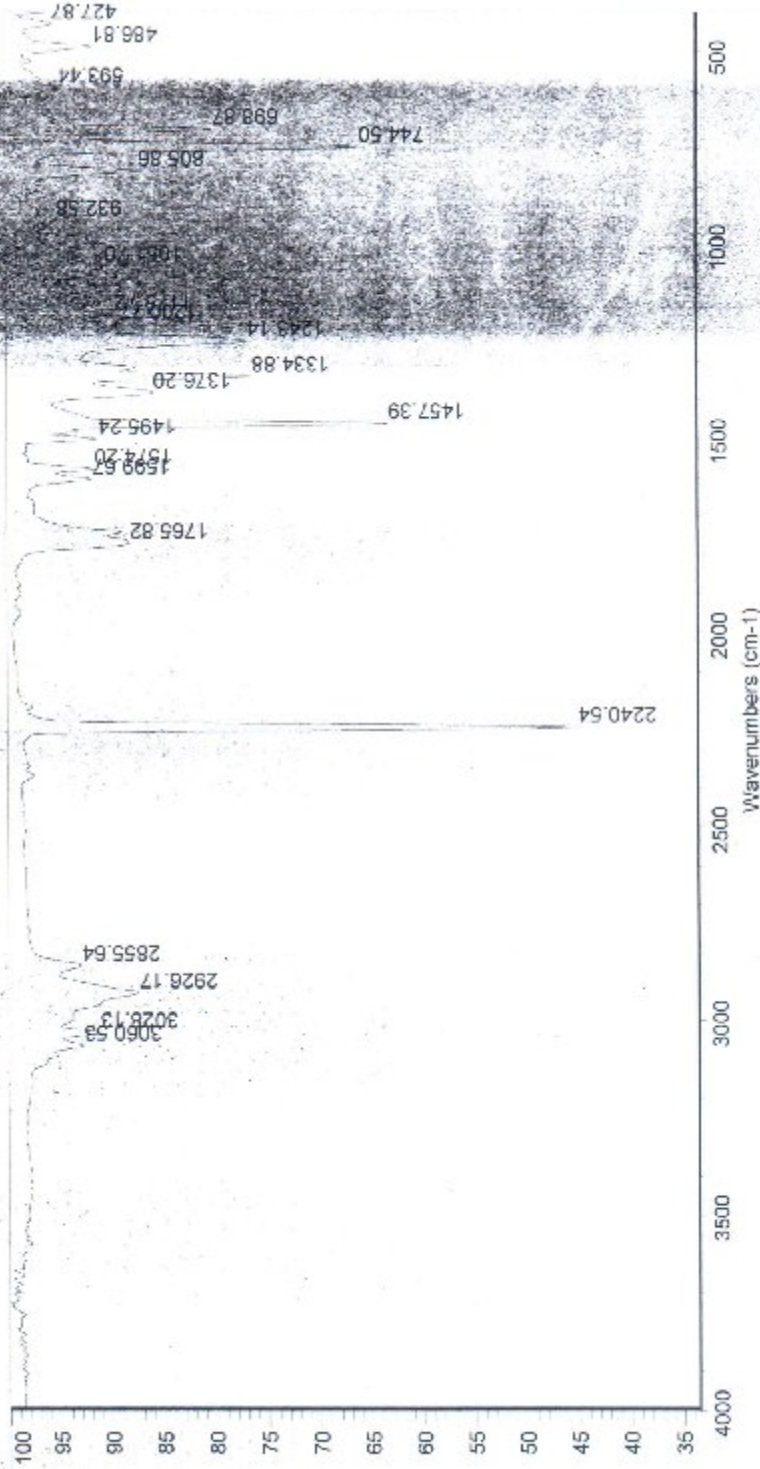

Sample Name: RT-FBTP (NEAT)  
Sample Preparation:  
Collection time: Fri Mar 03 14:51:10 2017 (GMT+05:30)  
Bench: Thermo Nicolet Nexus 670 Spectrometer  
Resolution: 4cm<sup>-1</sup>  
Detector: DTGS KB  
Beamsplitter: KBr  
Source: IR  
Analyst Name:

R Spectrum of 4aj

Indian Institute of Chemical Technology, Hyderabad  
FT-IR Analysis Report

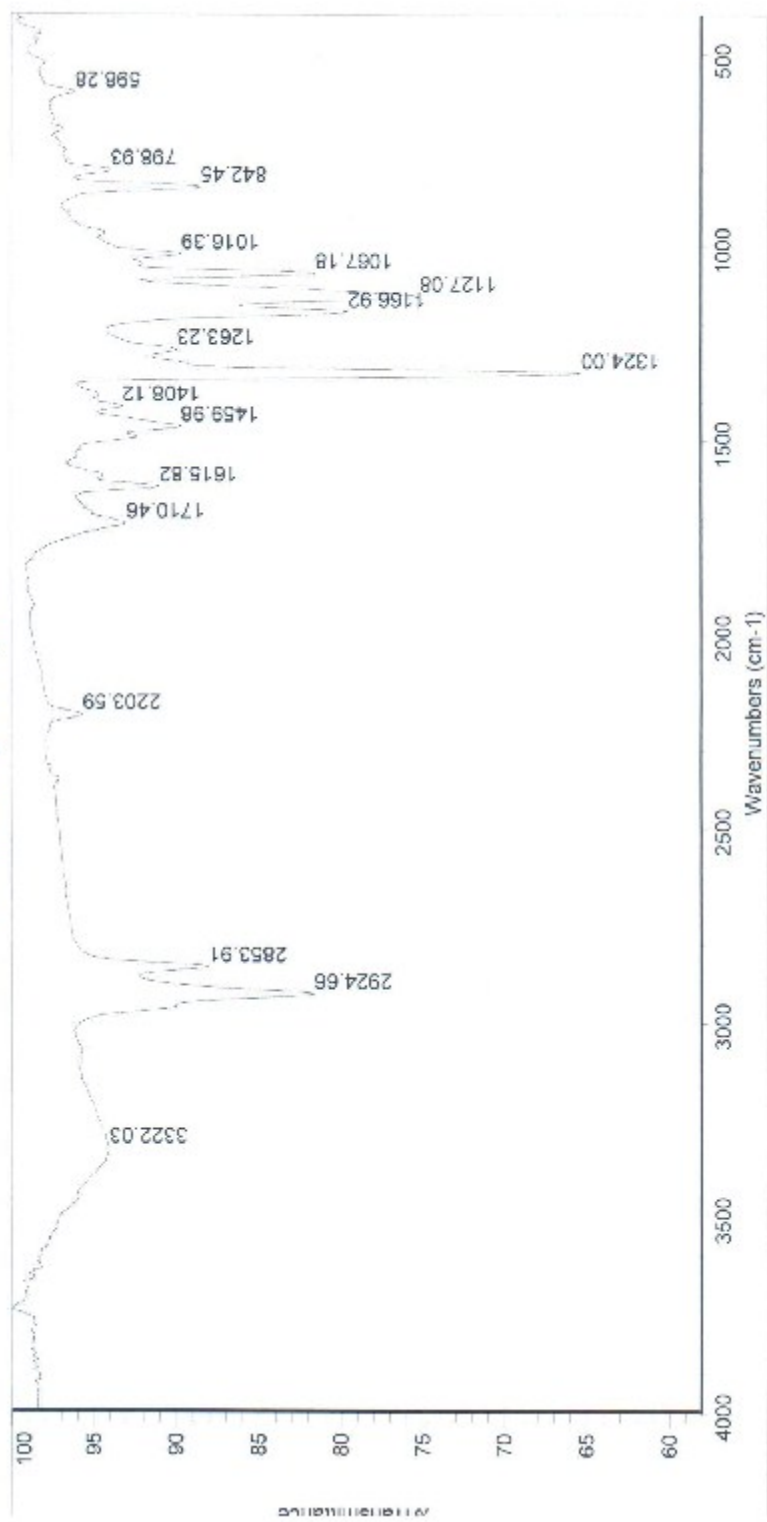

Sample Name: RT-FCF [NEAT]

Sample Preparation:

Collection time: Tue Mar 07 16:04:38 2017 (GMT+05:30)

Bench: Thermo Nicolet Nexus 670 Spectrometer

Resolution: 4cm-1

Detector: DTGS KB

Beam splitter: KBr

Source: IR

Analyst Name:

R Spectrum of 4al

Indian Institute of Chemical Technology, Hyderabad  
FT-IR Analysis Report

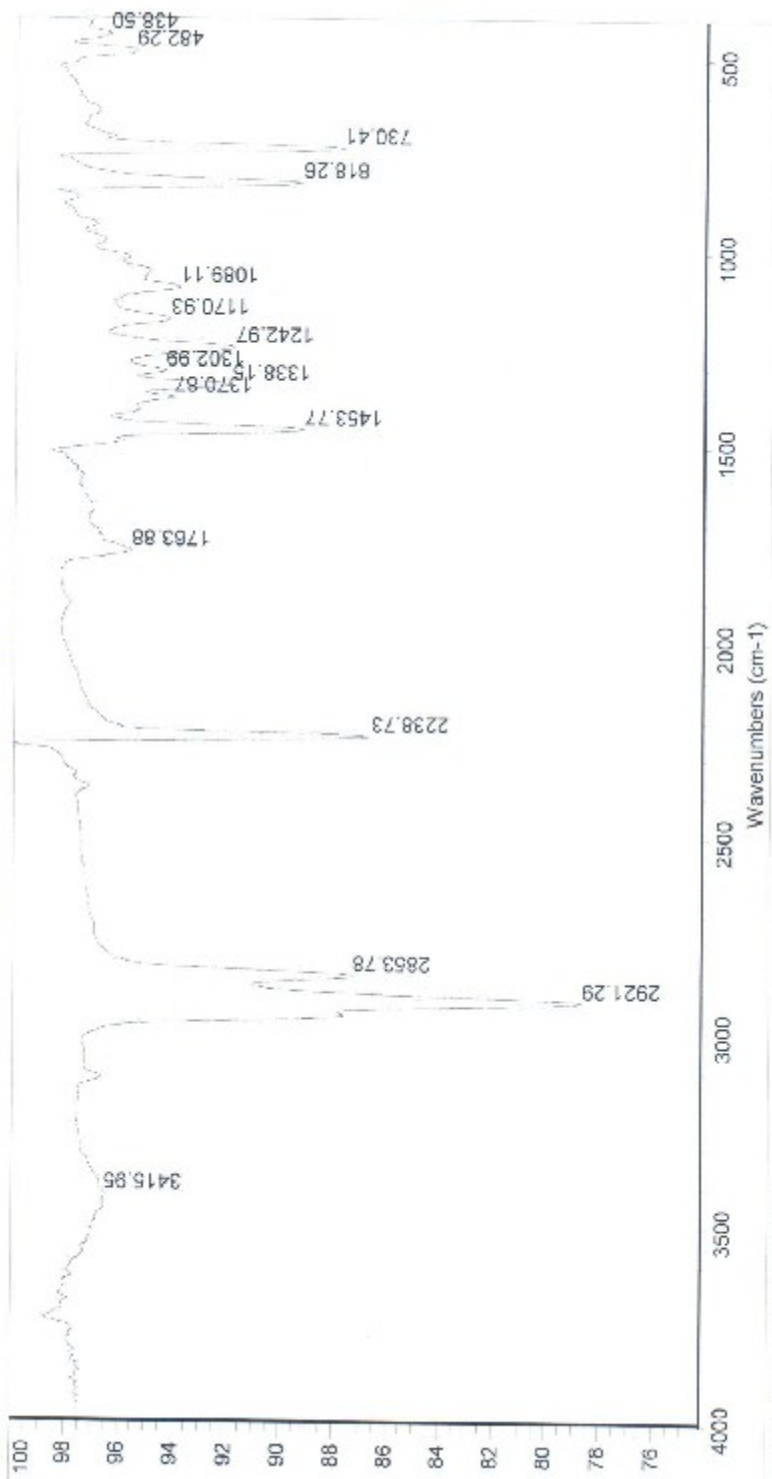

Sample Name: PRL-FCL [NEAT]

Sample Preparation:

Collection time: Thu Mar 02 11:29:32 2017 (GMT +05:30)

Batch: Thermo Nicolet Nexus 670 Spectrometer

Resolution: 4cm<sup>-1</sup>

Detector: DTGS KB

Beamsplitter: KBr

Source: IR

Analyst Name:

R Spectrum of 4am

Indian Institute of Chemical Technology, Hyderabad  
FT-IR Analysis Report

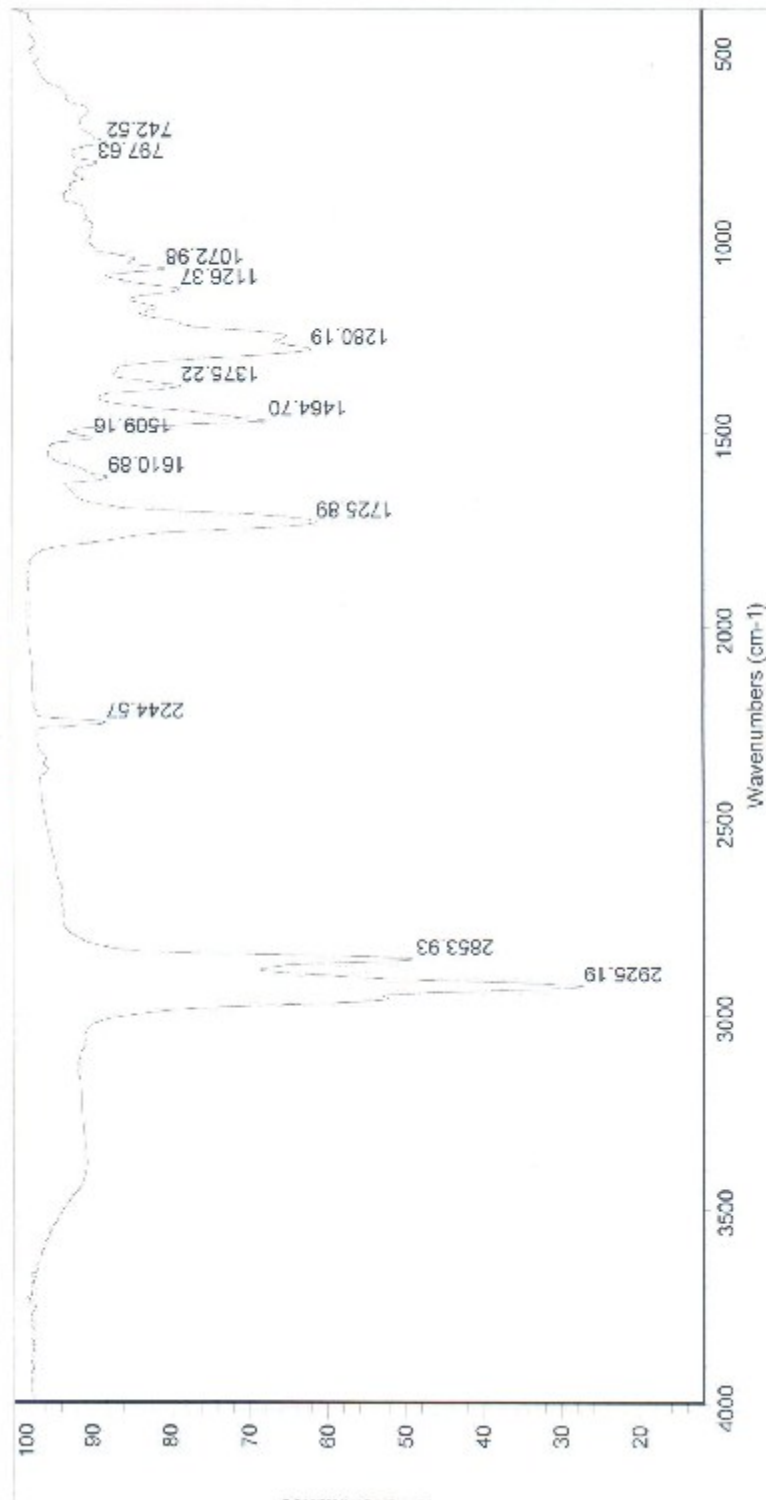

Sample Name: RT-FPOH [NEAT]

Sample Preparation:

Collection time: Fri Mar 03 15:01:21 2017 (GMT+05:30)

Bench: Thermo Nicolet Nexus 670 Spectrometer

Resolution: 4cm<sup>-1</sup>

Detector: DTGS KB

Beamsplitter: KBr

Source: IR

Analyst Name:

R Spectrum of 4ao

Indian Institute of Chemical Technology, Hyderabad  
FT-IR Analysis Report

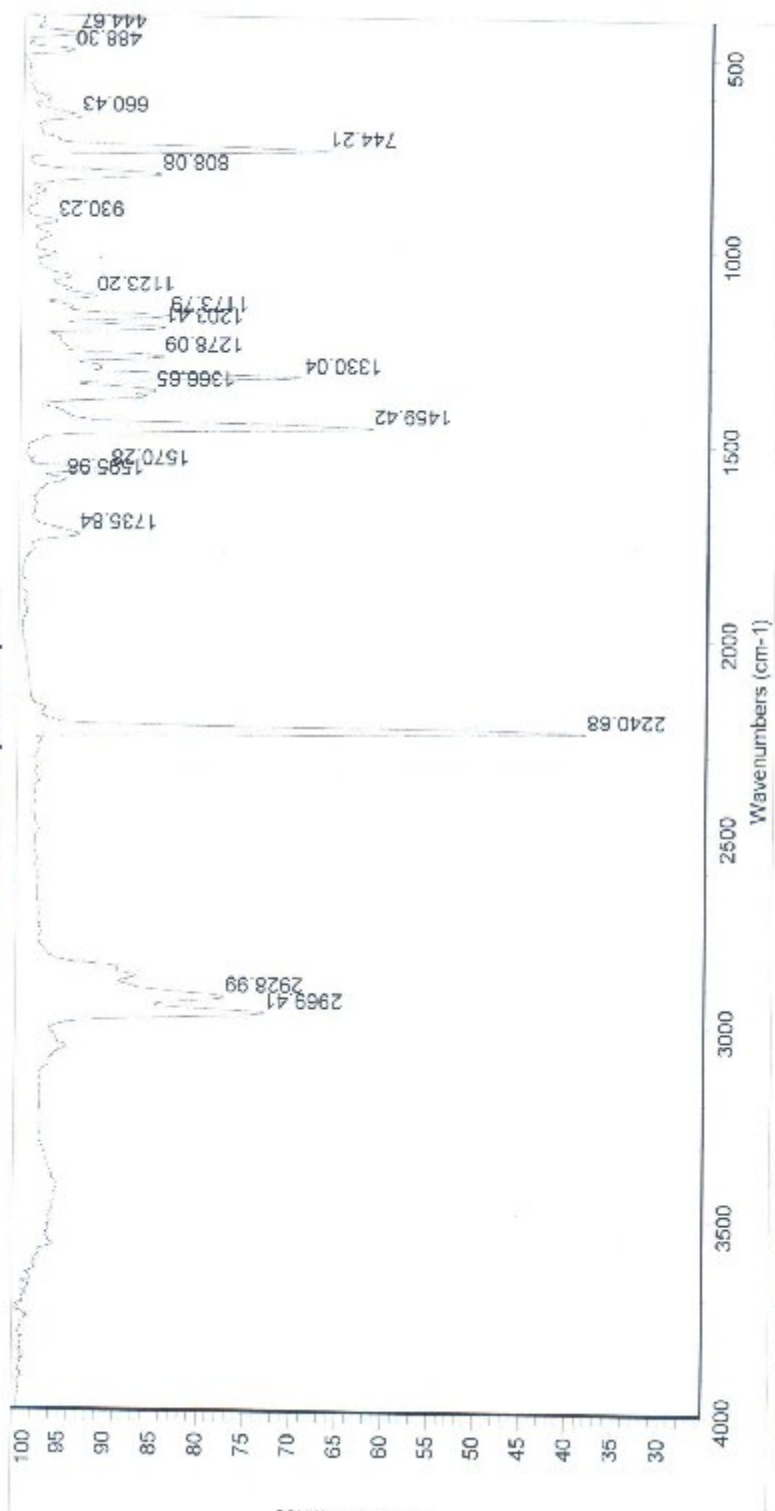

Sample Name: PRL-FSEC [NEAT]

Sample Preparation:

Collection time: Mon Mar 06 11:48:06 2017 (GMT+05:30)

Bench: Thermo Nicolet Nexus 670 Spectrometer

Resolution: 4cm<sup>-1</sup>

Detector: DTGS-KB

Beamsplitter: KBr

Source: IR

Analyst Name:

R Spectrum of 4ap

Indian Institute of Chemical Technology, Hyderabad  
FT-IR Analysis Report

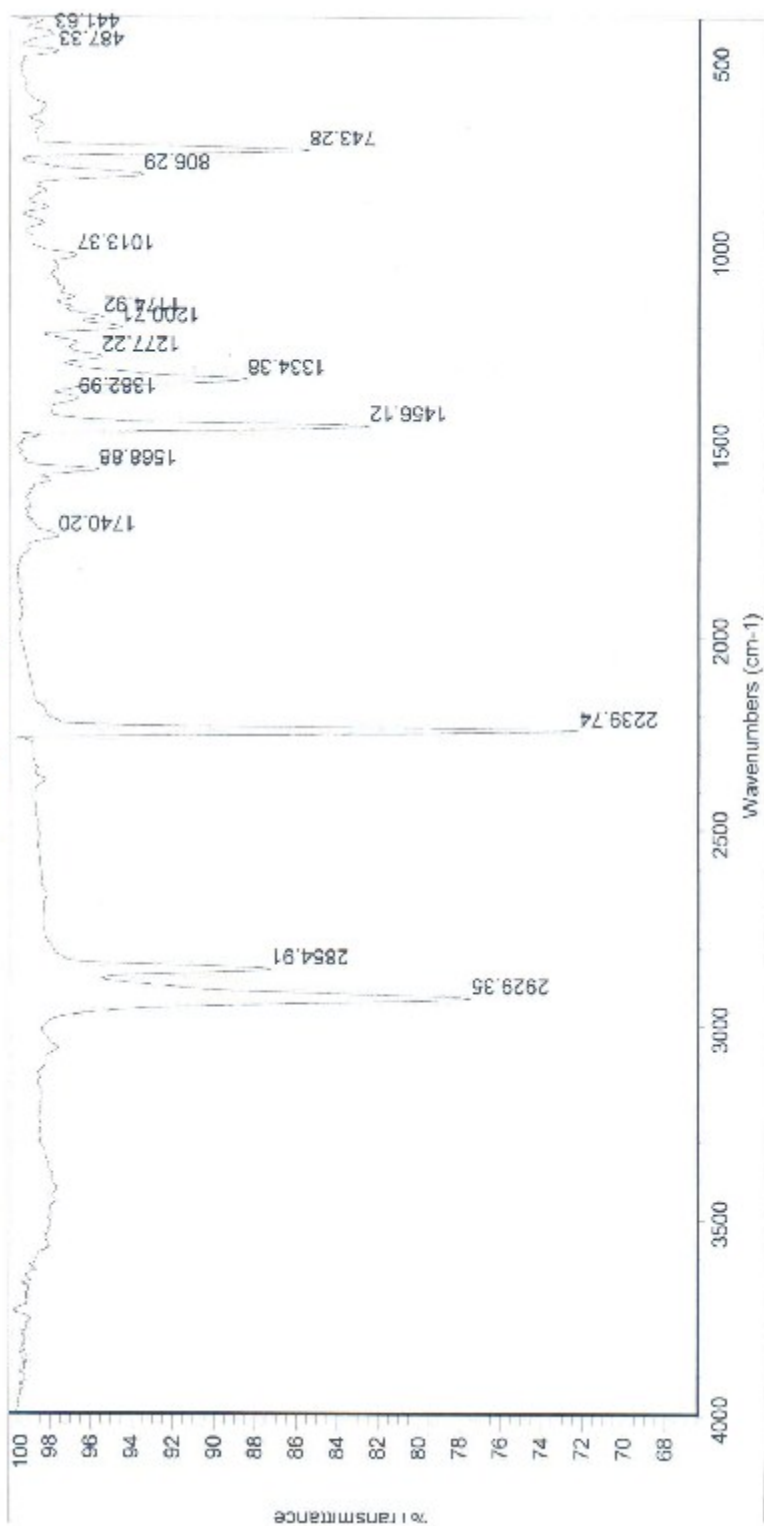

Sample Name: RT-CYH [NEAT]

Sample Preparation:

Collection Time: Tue Mar 07 15:45:24 2017 (GMT+05:30)

Bech: Thermo Nicolet Nexus 670 Spectrometer

Resolution: 4cm-1

Detector: DTGS KB

Beamsplitter: KBr

Source: IR

Analyst Name:

R Spectrum of 4be

Indian Institute of Chemical Technology, Hyderabad  
FT-IR Analysis Report

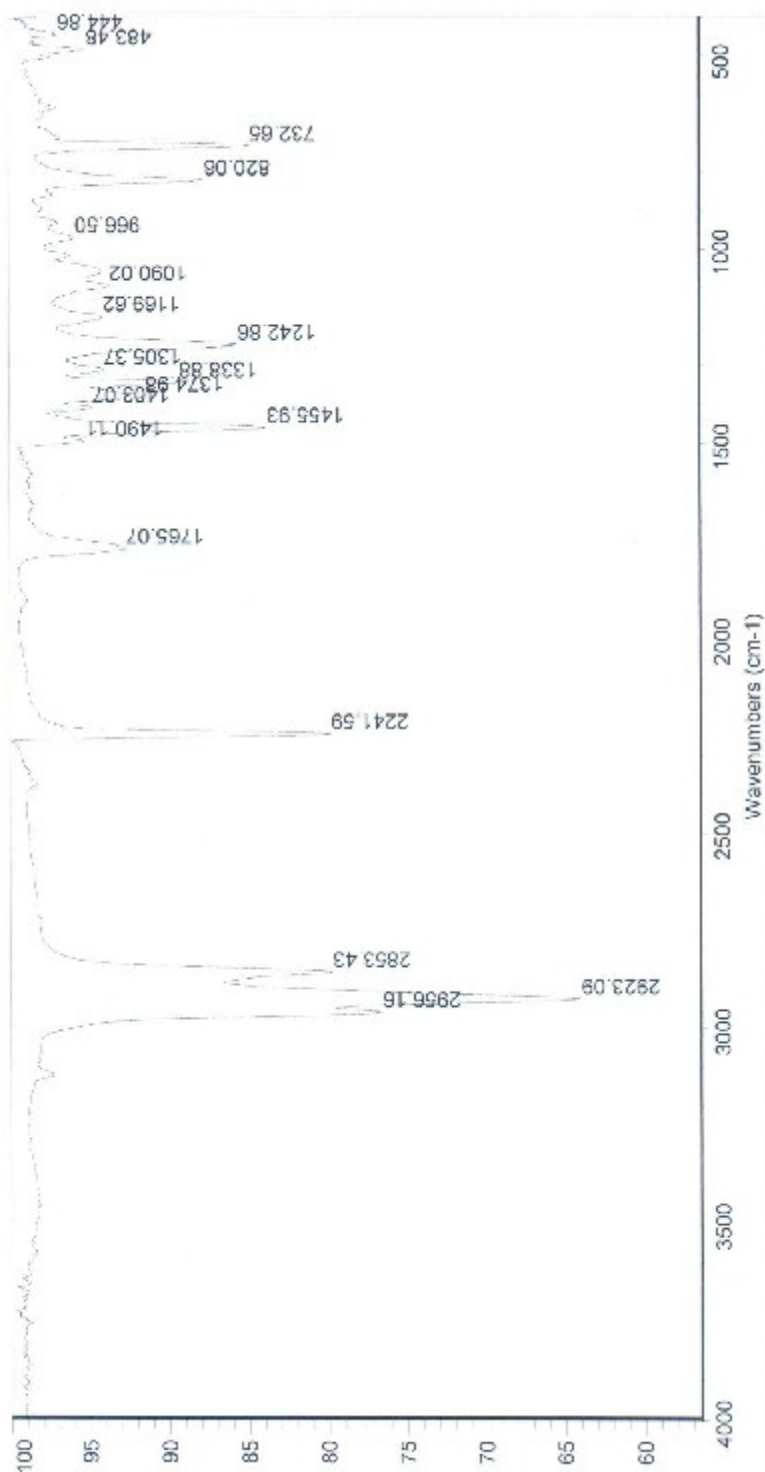

Sample Name: RT-CLP [NEAT]

Sample Preparation:

Collection time: Fri Mar 03 14:47:54 2017 (GMT+05:30)

Bench: Thermo Nicolet Nexus 670 Spectrometer

Resolution: 4cm-1

Detector: DTGS KB

Beamsplitter: KBr

Source: IR

Analyst Name:

R Spectrum of 4bf

Indian Institute of Chemical Technology, Hyderabad  
FT-IR Analysis Report

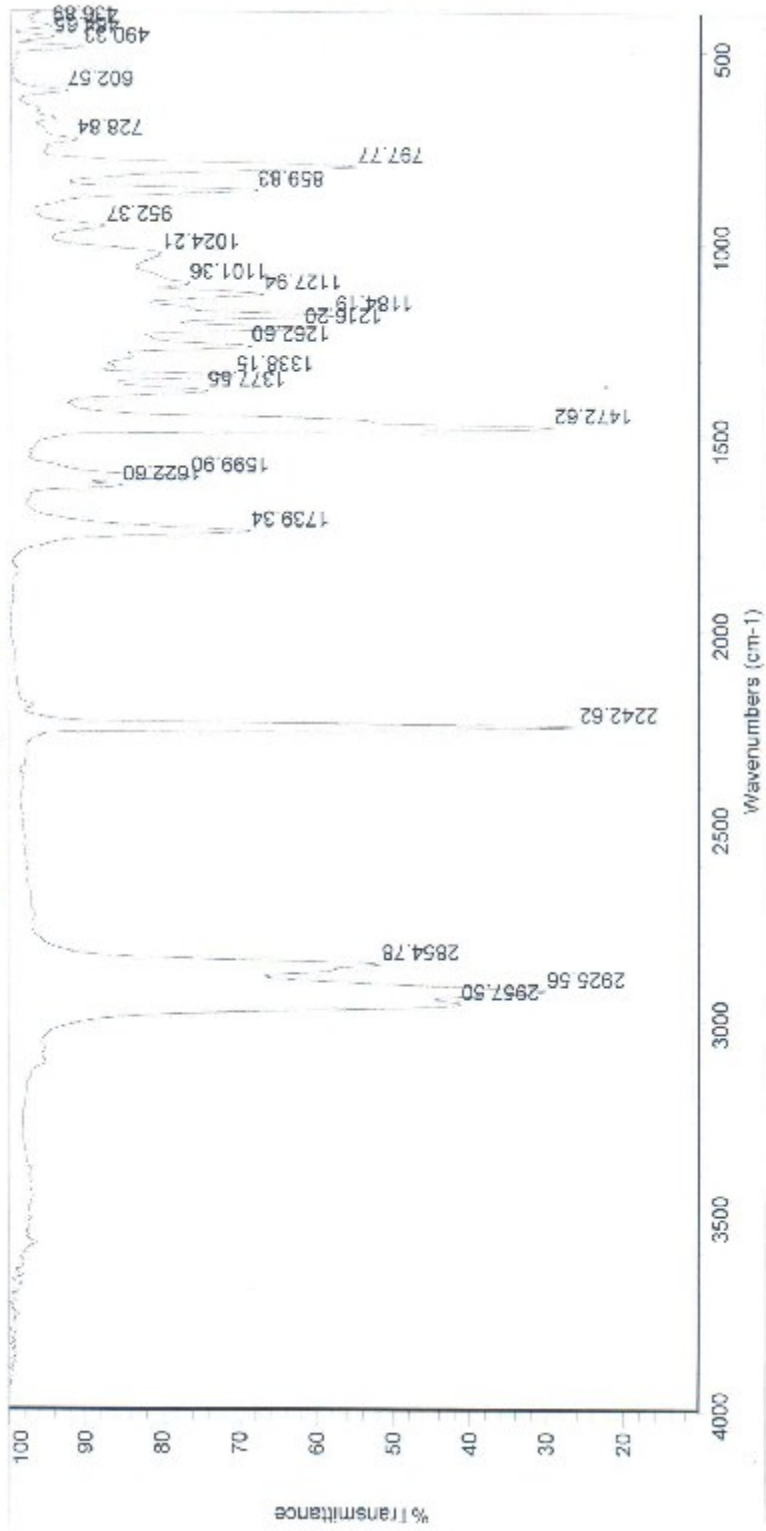

Sample Name: PRL-CPT [NEAT]

Sample Preparation

Collection time: Tue Mar 07 15:48:41 2017 (GMT+05:30)

Bench: Thermo Nicolet Nexus 670 Spectrometer

Resolution: 4/cm-1

Detector: DTGS KB

Beam splitter: KB

Source: IR

Analyst Name:

R Spectrum of 4bg



Indian Institute of Chemical Technology, Hyderabad  
FT-IR Analysis Report

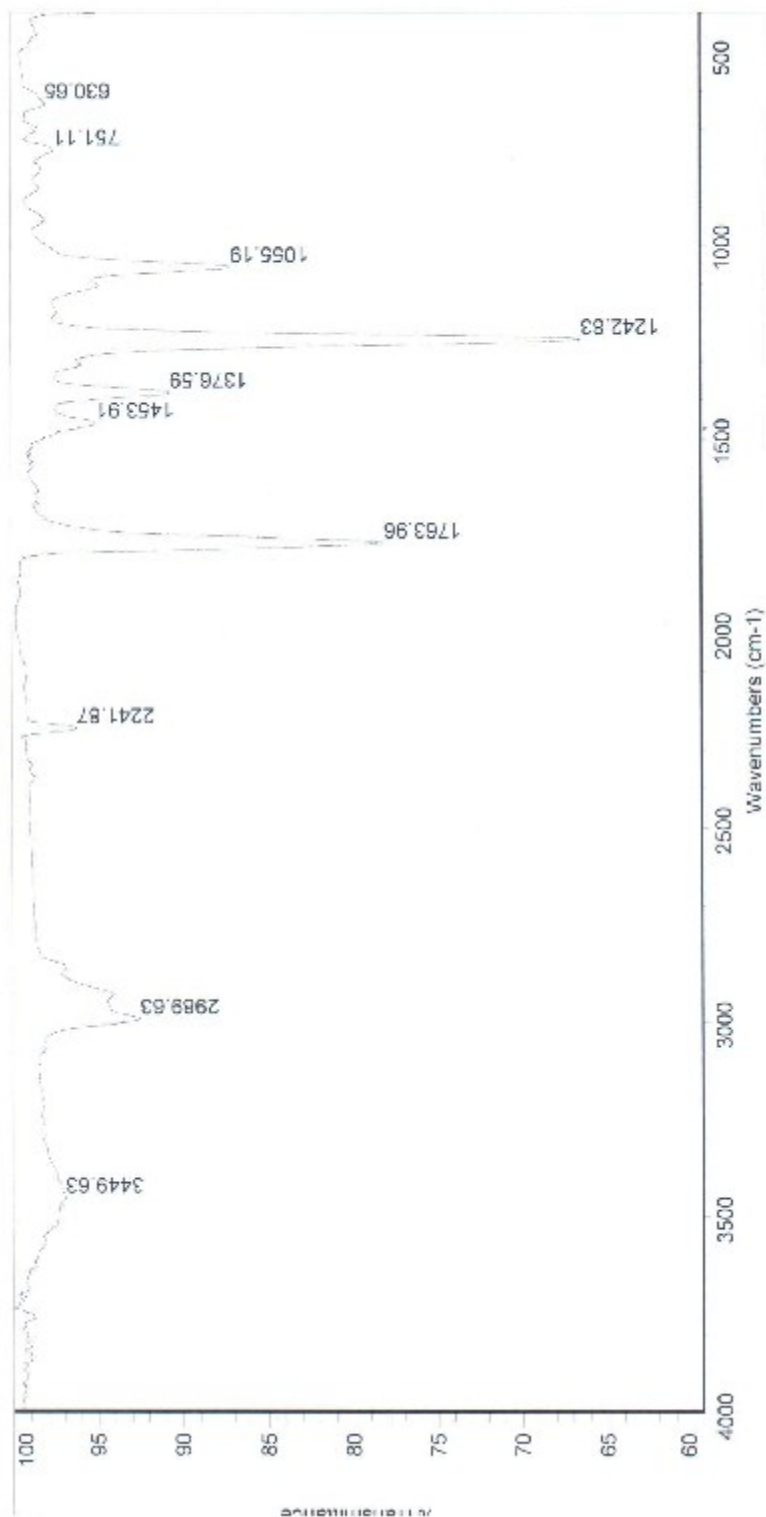

Sample Name: RT-PHTT (NEAT)

Sample Preparation:

Collection time: Thu Mar 02 16:10:45 2017 (GMT+05:30)

Bench: Thermo Nicolet Nexus 670 Spectrometer

Resolution: 4cm<sup>-1</sup>

Detector: DTGS K8

Beamsplitter: KBr

Source: IR

Analyst Name:

R Spectrum of 4bh

Indian Institute of Chemical Technology, Hyderabad  
FT-IR Analysis Report

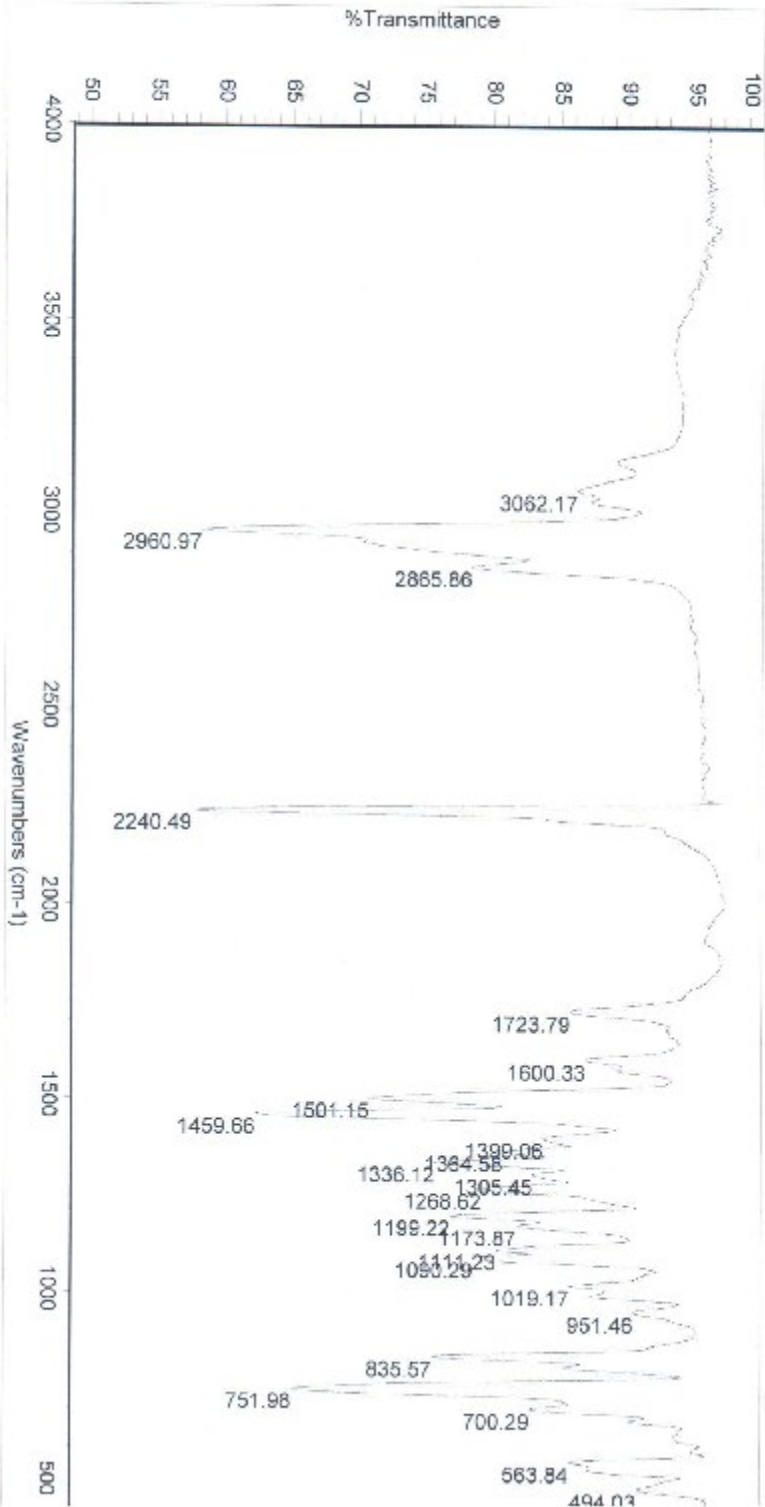

Sample Name: RT-TBP [NEAT]  
Sample Preparation:  
Collection time: Thu Mar 02 15:18:08 2017 (GMT+05:30)  
Bench: Thermo Nicolet Nexus 570 Spectrometer  
Resolution: 4cm-1

Detector: DTGS KB  
Beamsplitter: KBr  
Source: IR  
Analyst Name:

R Spectrum of 4bi

Indian Institute of Chemical Technology, Hyderabad  
FT-IR Analysis Report

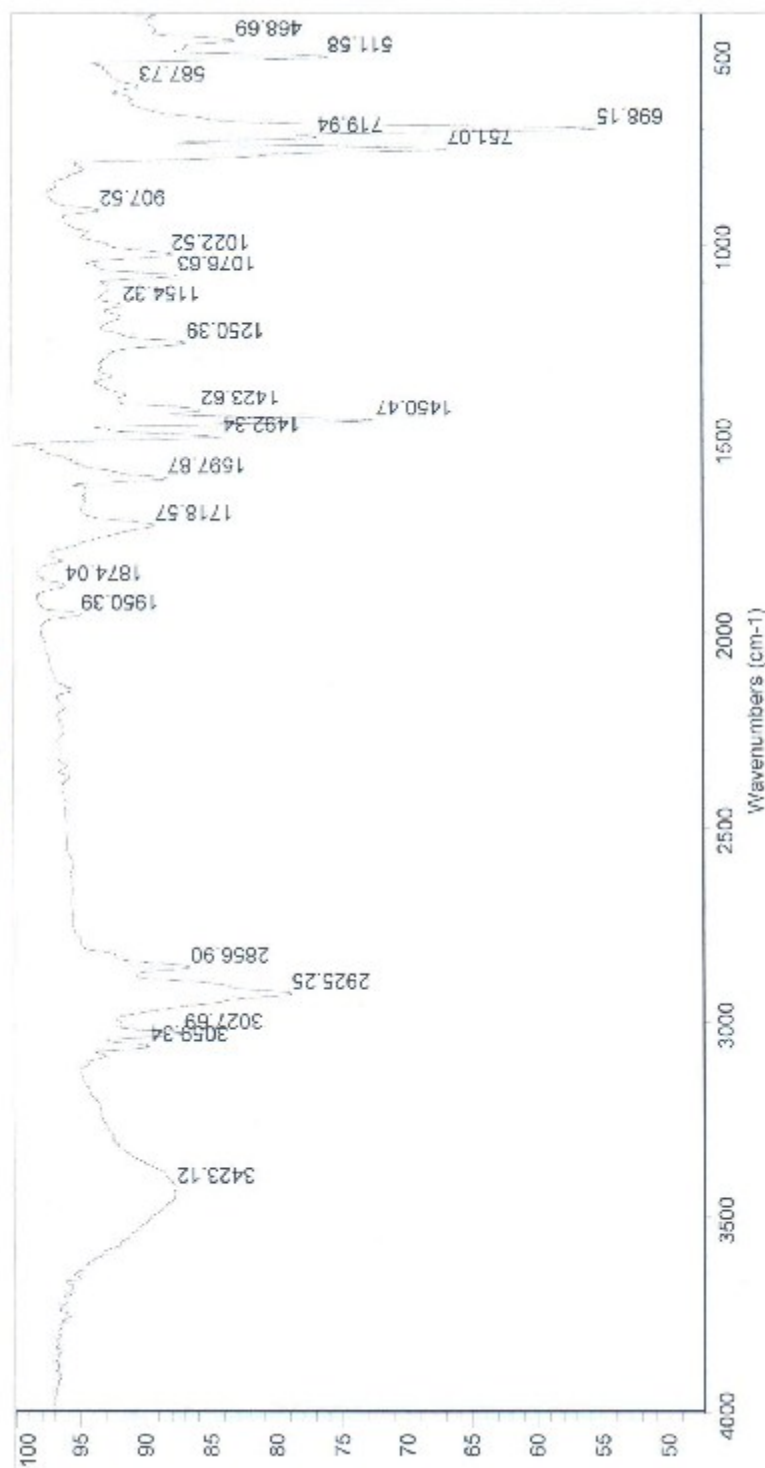

Sample Name: RT-BTP [KBr]

Sample Preparation:

Collection time: Fri Mar 03 12:47:42 2017 (GMT+05:30)

Bench: Thermo Nicolet Nexus 670 Spectrometer

Resolution: 4cm-1

Detector: DTGS KB

Beamsplitter: KBr

Source: IR

Analyst Name:

R Spectrum of 4bj

Indian Institute of Chemical Technology, Hyderabad  
 FT-IR Analysis Report

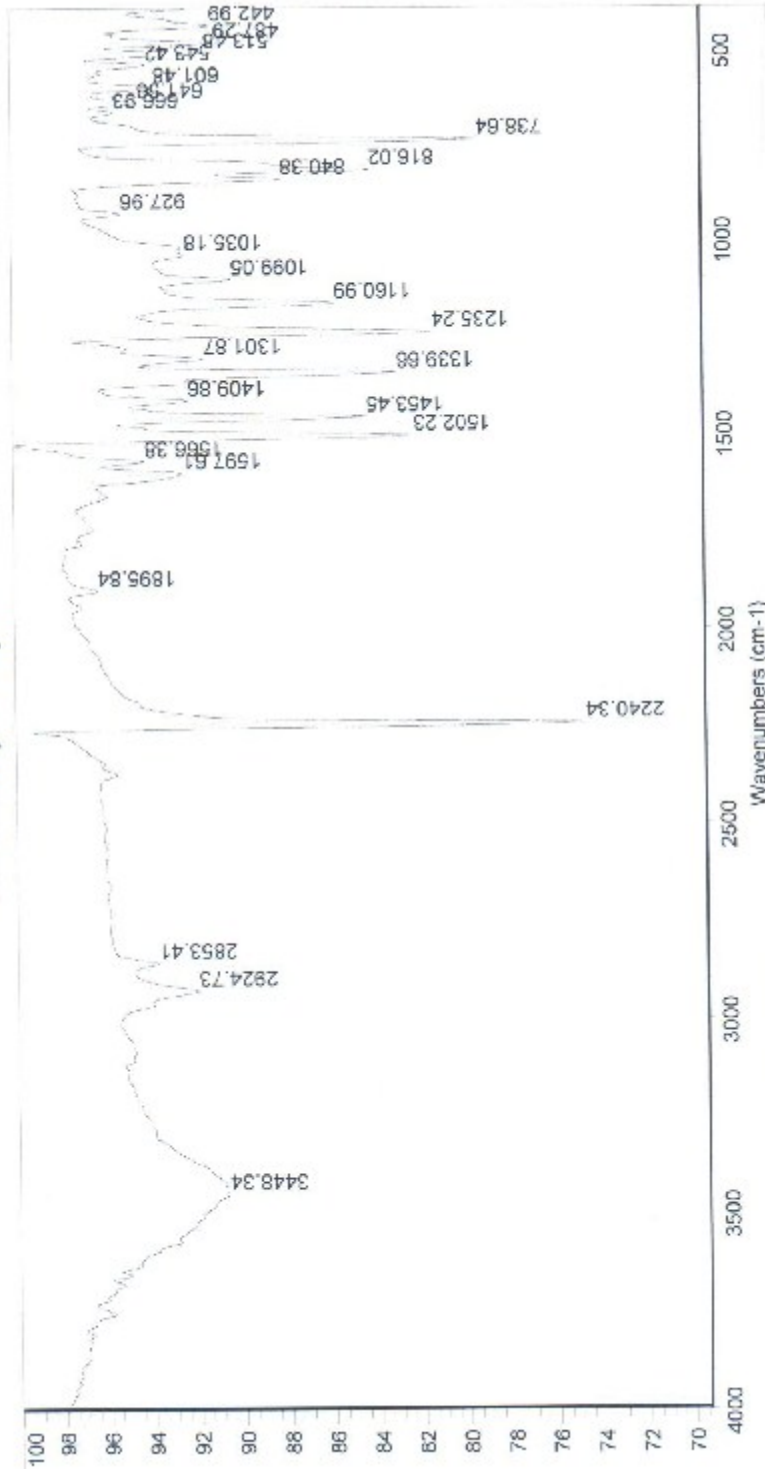

Sample Name: PRL-IFT [KBr]

Sample Preparation:

Collection time: Thu Mar 02 13:15:34 2017 (GMT+05:30)

Bench: Thermo Nicolet Nexus 670 Spectrometer

Resolution: 4cm<sup>-1</sup>

Detector: DTGS KB

Beamsplitter: KBr

Source: IR

Analyst Name:

R Spectrum of 4bk

Indian Institute of Chemical Technology, Hyderabad  
FT-IR Analysis Report

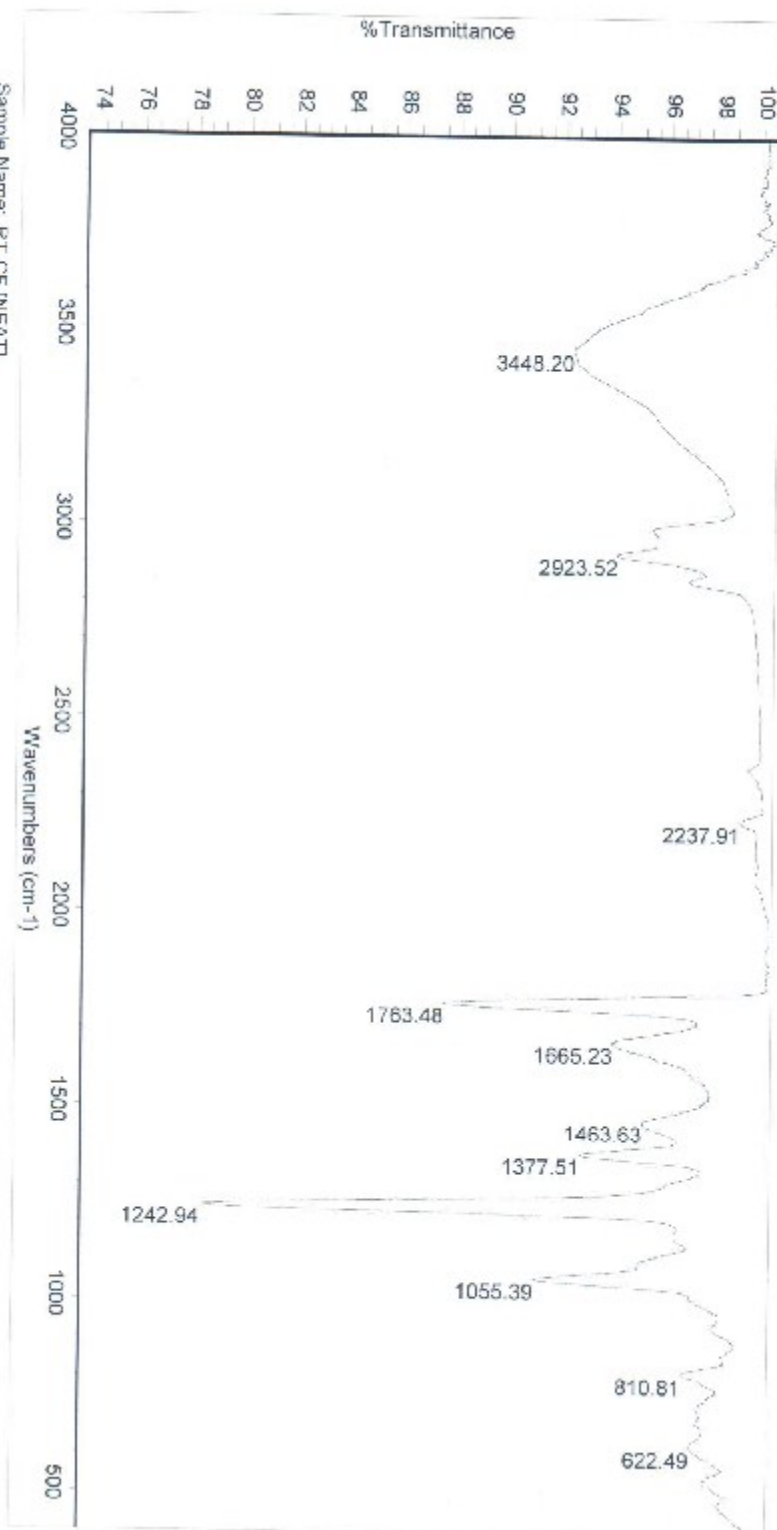

Sample Name: RT-CF [NEAT]  
Sample Preparation:  
Collection time: Mon Mar 06 12:03:21 2017 (GMT+05:30)  
Bench: Thermo Nicolet Nexus 670 Spectrometer  
Resolution: 4cm-1

Detector: DTGS,KB  
Beamsplitter: KBr  
Source: IR  
Analyst Name:

R Spectrum of 4bl

Indian Institute of Chemical Technology, Hyderabad  
FT-IR Analysis Report

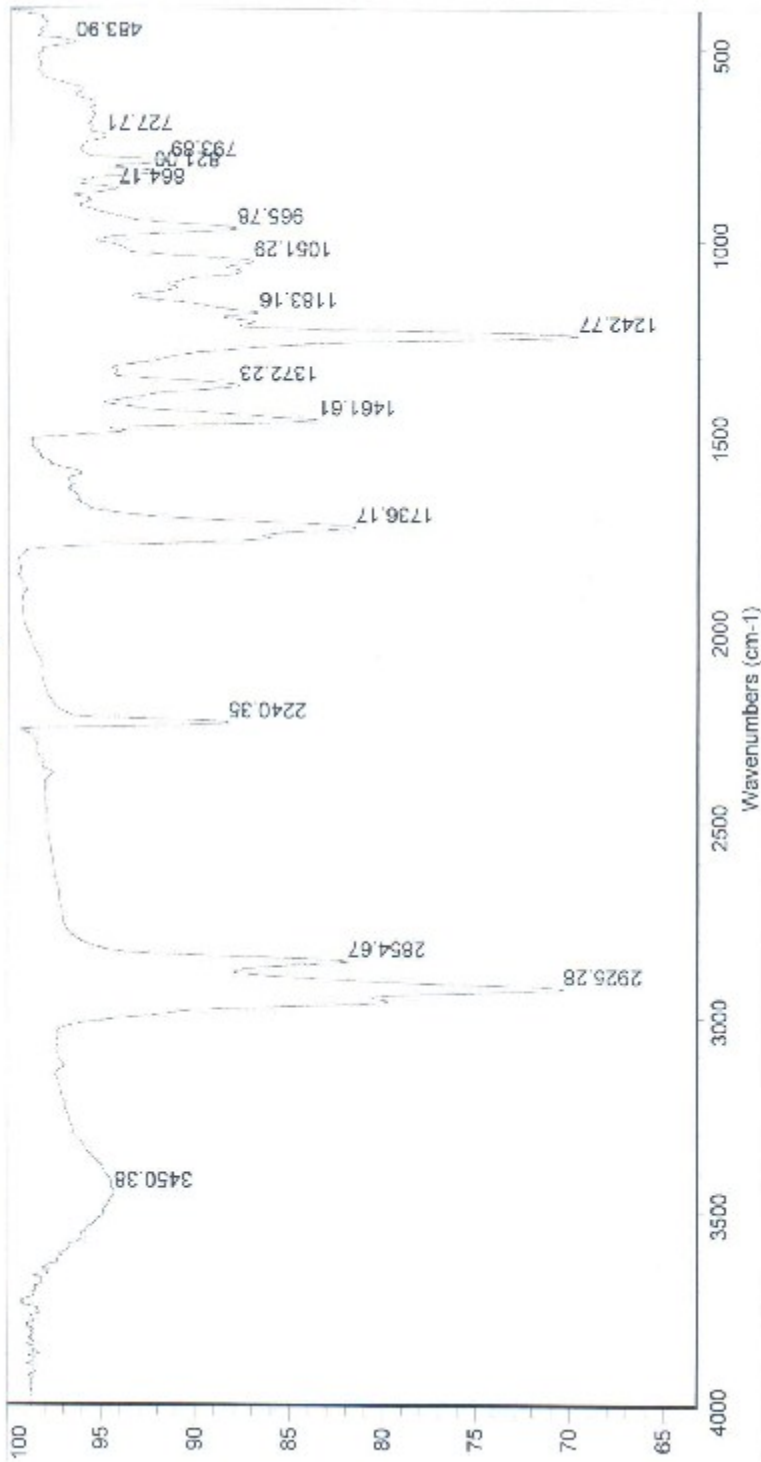

Sample Name: RT-CLTD [NEAT]

Sample Preparation:

Collection time: Mon Mar 08 12:08:40 2017 (GMT+05:30)

Bench: Thermo Nicolet Nexus 670 Spectrometer

Resolution: 4cm-1

Detector: DTGS KB

Beamsplitter: KB

Source: IR

Analyst Name:

R Spectrum of 4bm

Indian Institute of Chemical Technology, Hyderabad  
FT-IR Analysis Report

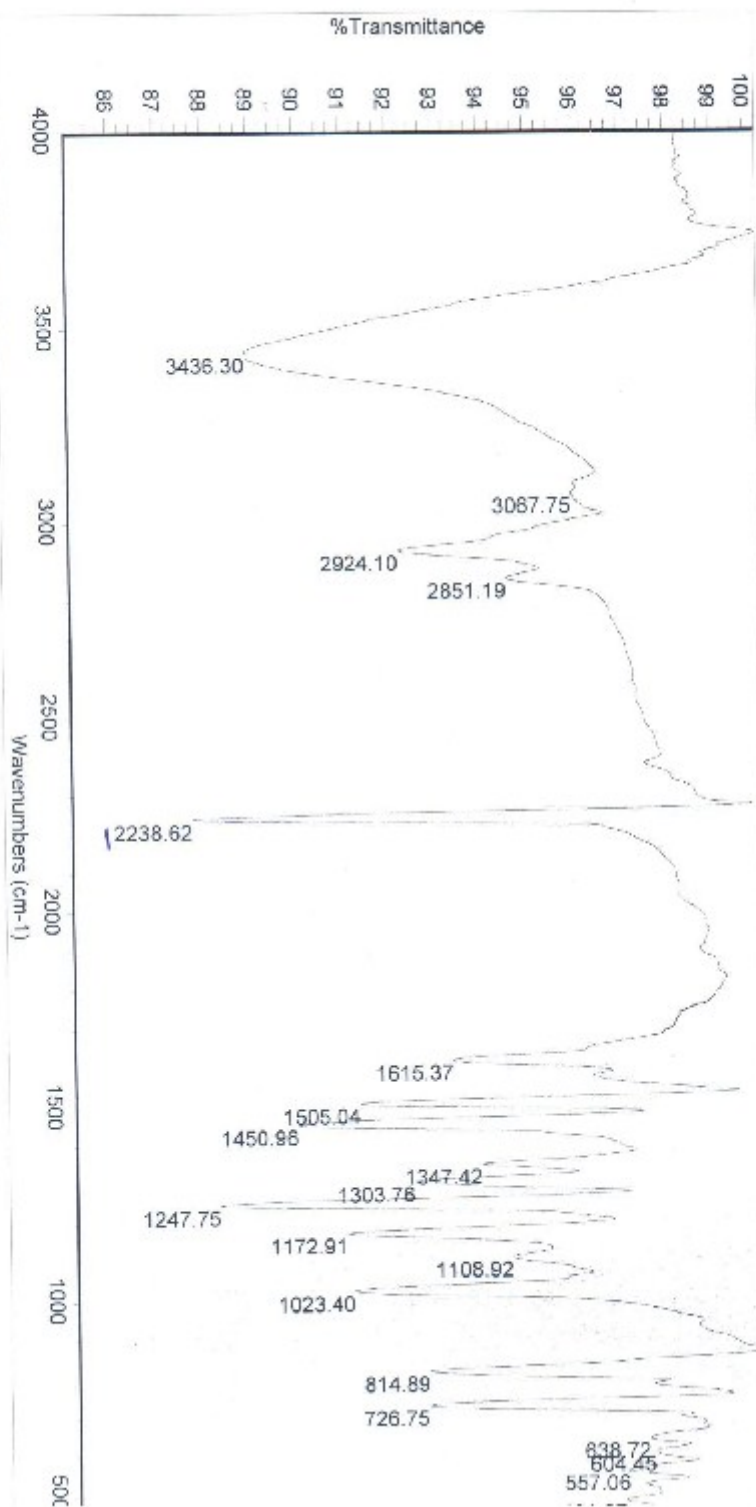

Sample Name: RT-QME [KBr]  
Sample Preparation:  
Collection time: Wed Mar 01 12:56:35 2017 (GMT+05:30)  
Barich: Thermo Nicolet Nexus 670 Spectrometer  
Resolution: 4cm-1

Detector: DTGS KB  
Beamsplitter: KBr  
Source: IR  
Analyst Name:

IR Spectrum of 4bn

Indian Institute of Chemical Technology, Hyderabad  
FT-IR Analysis Report

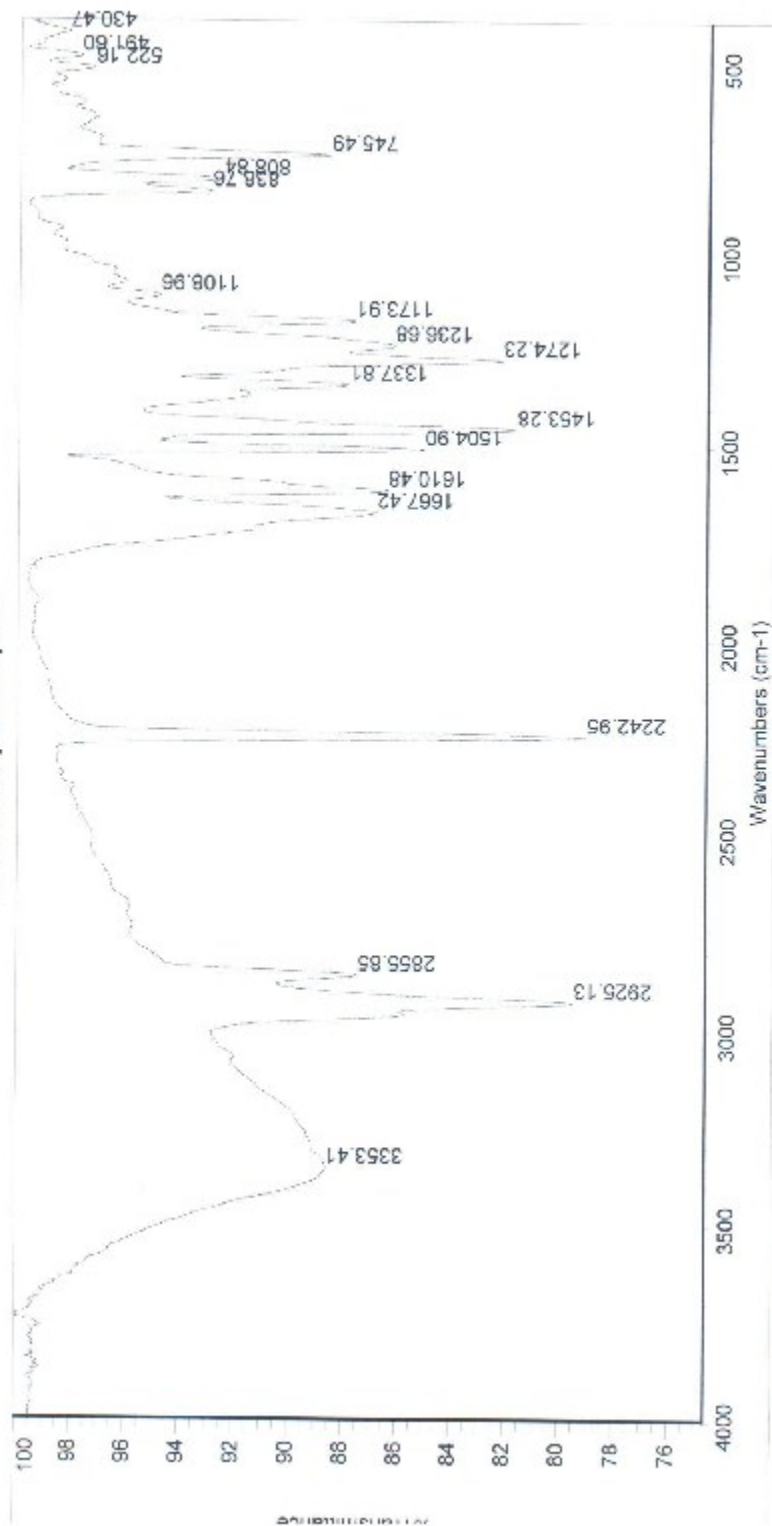

Sample Name: PRL-POH (NEAT)

Sample Preparation:

Collection time: Tue Mar 07 15:55:08 2017 (GMT+05:30)

Bench: Thermo Nicolet Nexus 670 Spectrometer

Resolution: 4cm-1

Detector: DTGS KB

Beamsplitter: KB

Source: IR

Analyst Name:

R Spectrum of 4bo



Indian Institute of Chemical Technology, Hyderabad  
FT-IR Analysis Report

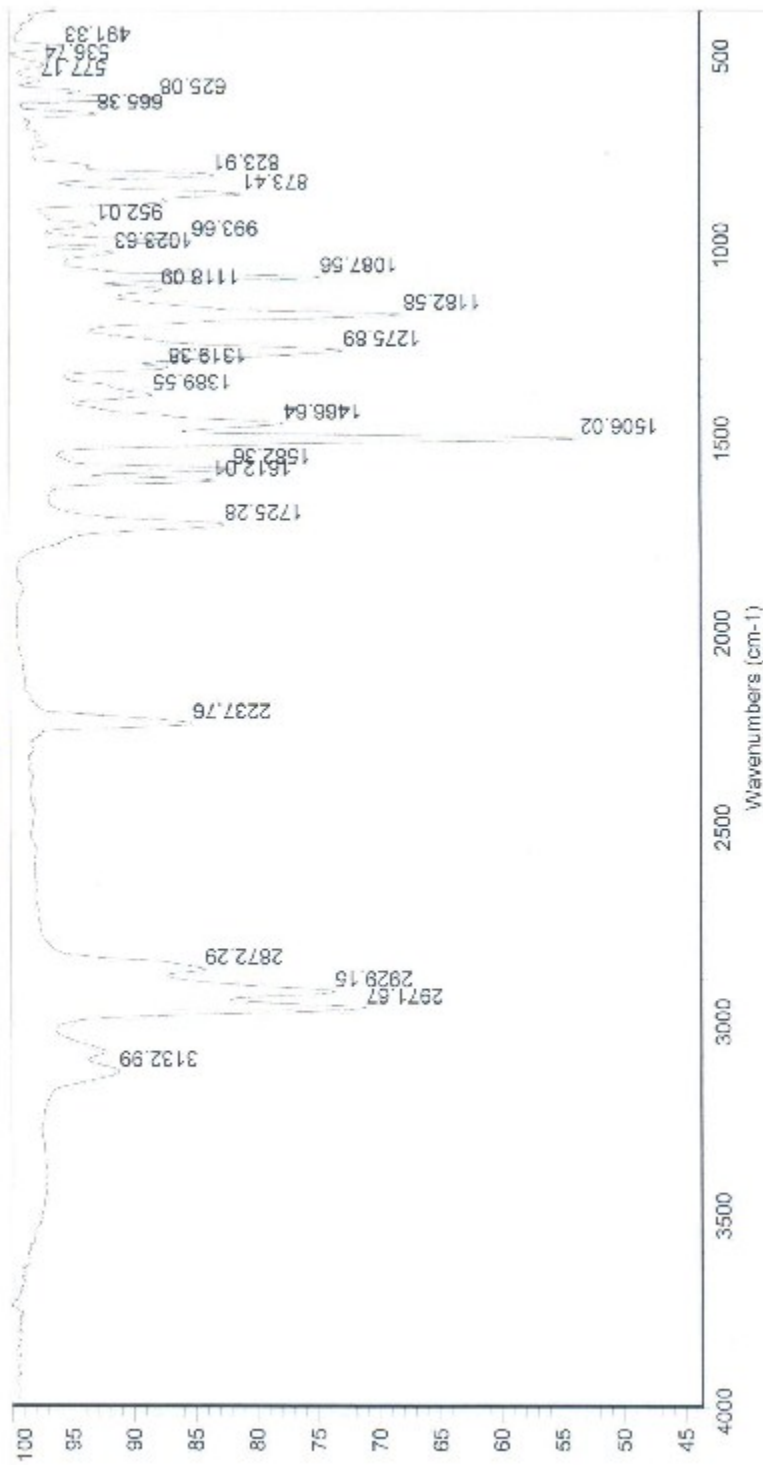

Sample Name: PRL-SEC [NEAT]

Sample Preparation:

Collection time: Fri Mar 03 15:04:50 2017 (GMT+05:30)

Bench: Thermo Nicolet Nexus 670 Spectrometer

Resolution: 4cm-1

Detector: DTGS KB

Beamsplitter: KBr

Source: IR

Analyst Name:

R Spectrum of 4bp

Indian Institute of Chemical Technology, Hyderabad  
FT-IR Analysis Report

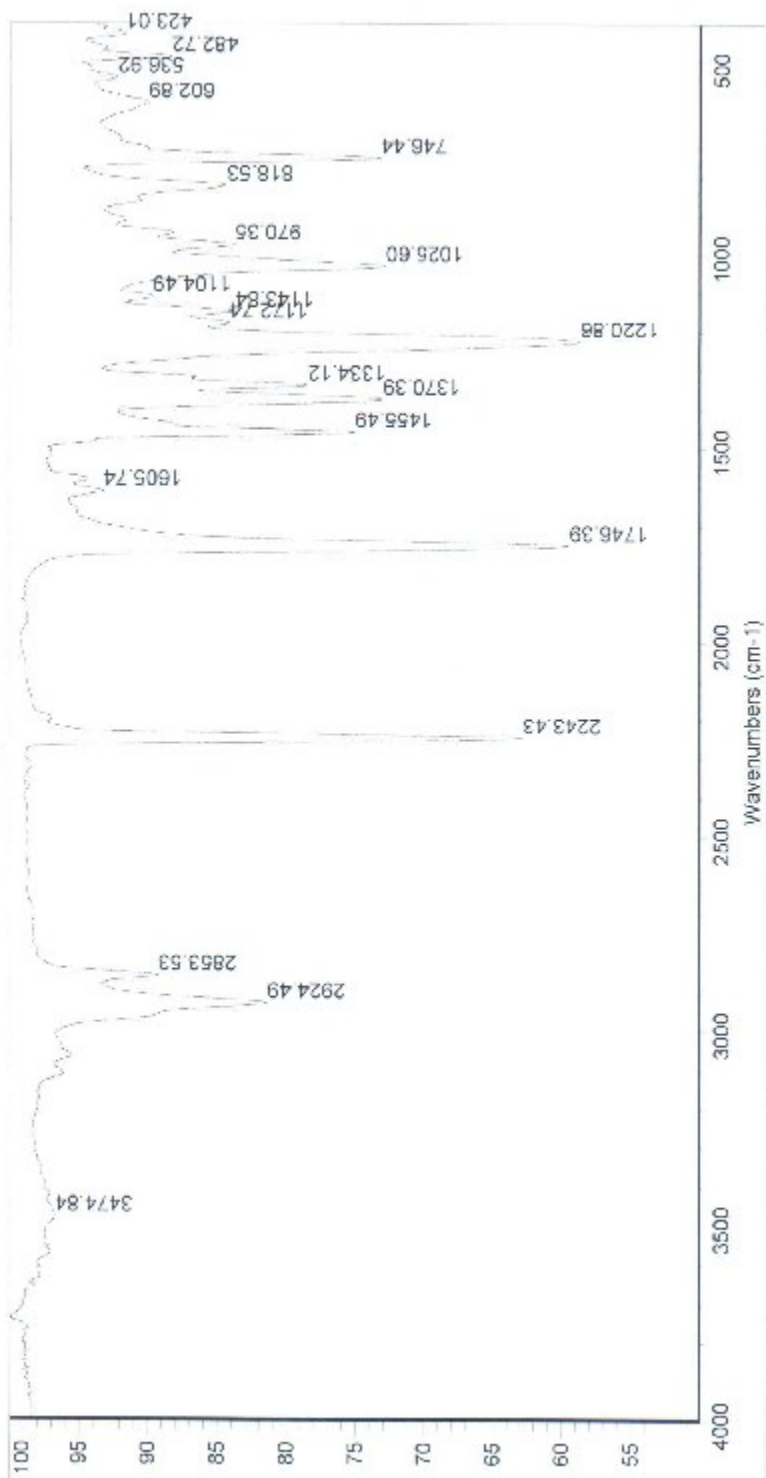

Sample Name: RT-PRE [NEAT]

Sample Preparation

Collection time: Tue Mar 07 15:42:01 2017 (GMT+05:30)

Branch: Thermo Nicolet Nexus 670 Spectrometer

Resolution: 4cm-1

Detector: DTGS KBr

Beamsplitter: KBr

Source: IR

Analyst Name:

R Spectrum of 4bq

Indian Institute of Chemical Technology, Hyderabad  
FT-IR Analysis Report

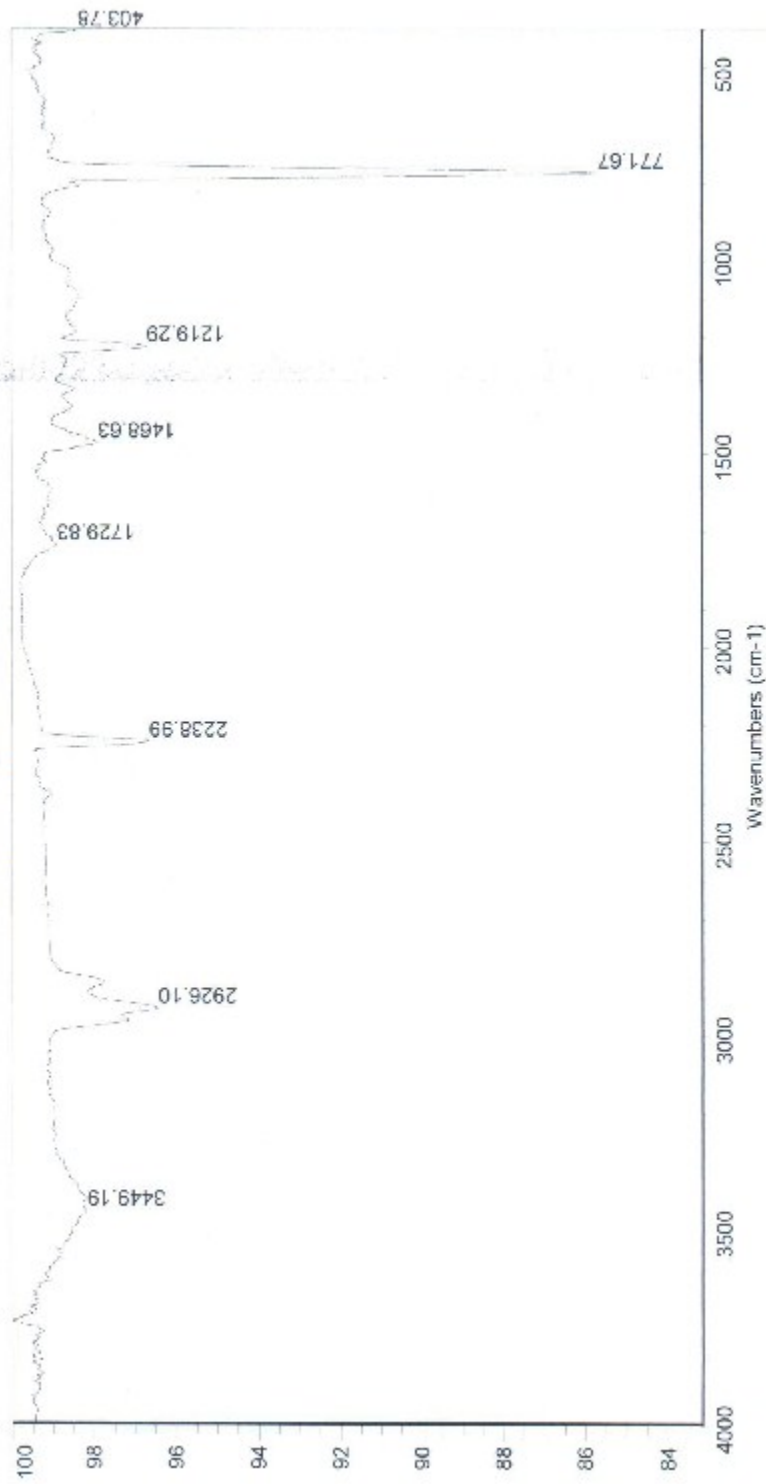

Sample Name: RT-MHP [NEAT]

Sample Preparation:

Collection time: Fri Mar 03 15:45:38 2017 (GMT+05:30)

Bench: Thermo Nicolet Nexus 670 Spectrometer

Resolution: 4cm-1

Detector: DTGS KB

Beamsplitter: KBr

Source: IR

Analyst Name:

R Spectrum of 4cd

Indian Institute of Chemical Technology, Hyderabad  
 FT-IR Analysis Report

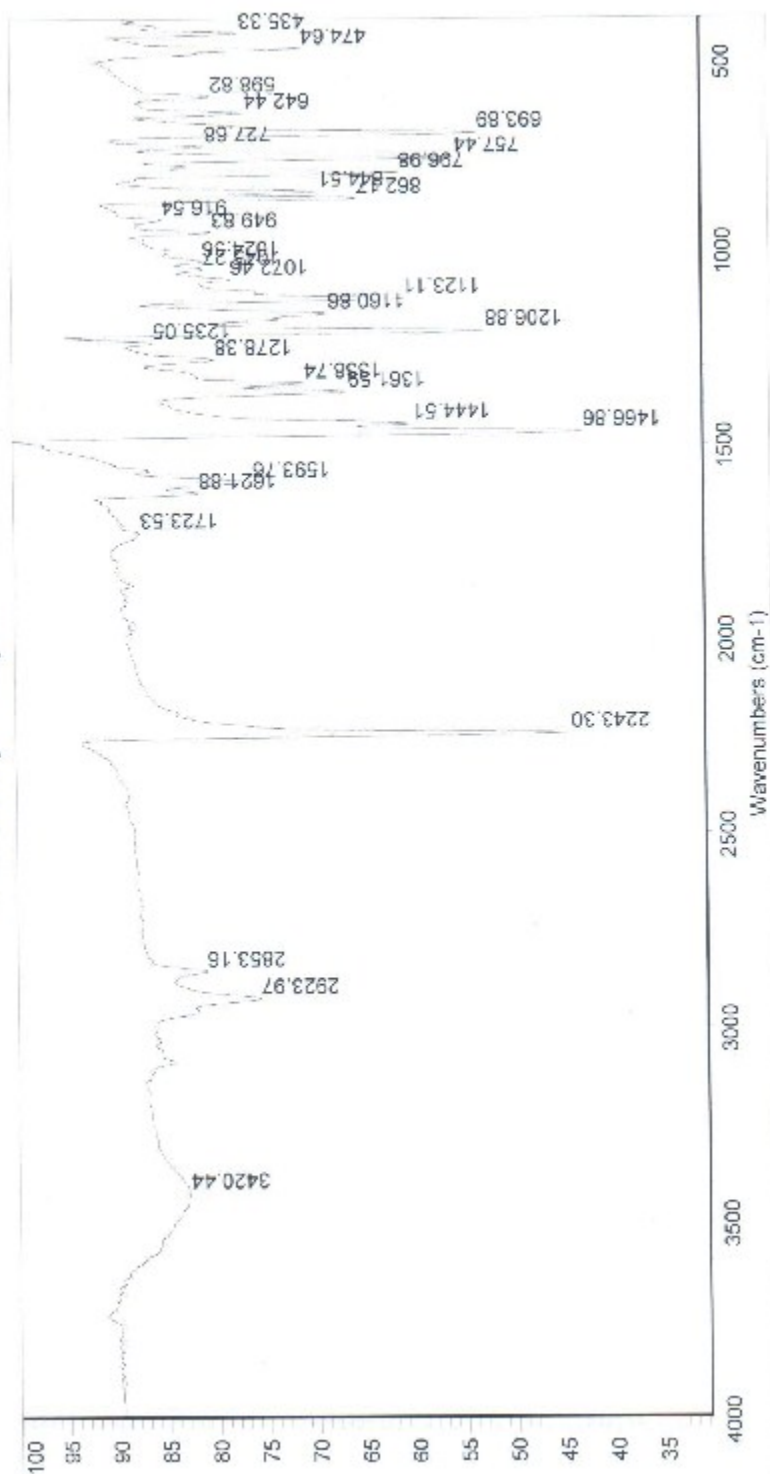

Detector: DTGS KB  
 Beamsplitter: KBr  
 Source: IR  
 Analyst Name:

Sample Name: RT-MPH [KB]  
 Sample Preparation:  
 Collection time: Thu Mar 02 13:13 05 2017 (GMT+05:30)  
 Bench: Thermo Nicolet Nexus 670 Spectrometer  
 Resolution: 4cm-1

R Spectrum of 4ch

Indian Institute of Chemical Technology, Hyderabad  
FT-IR Analysis Report

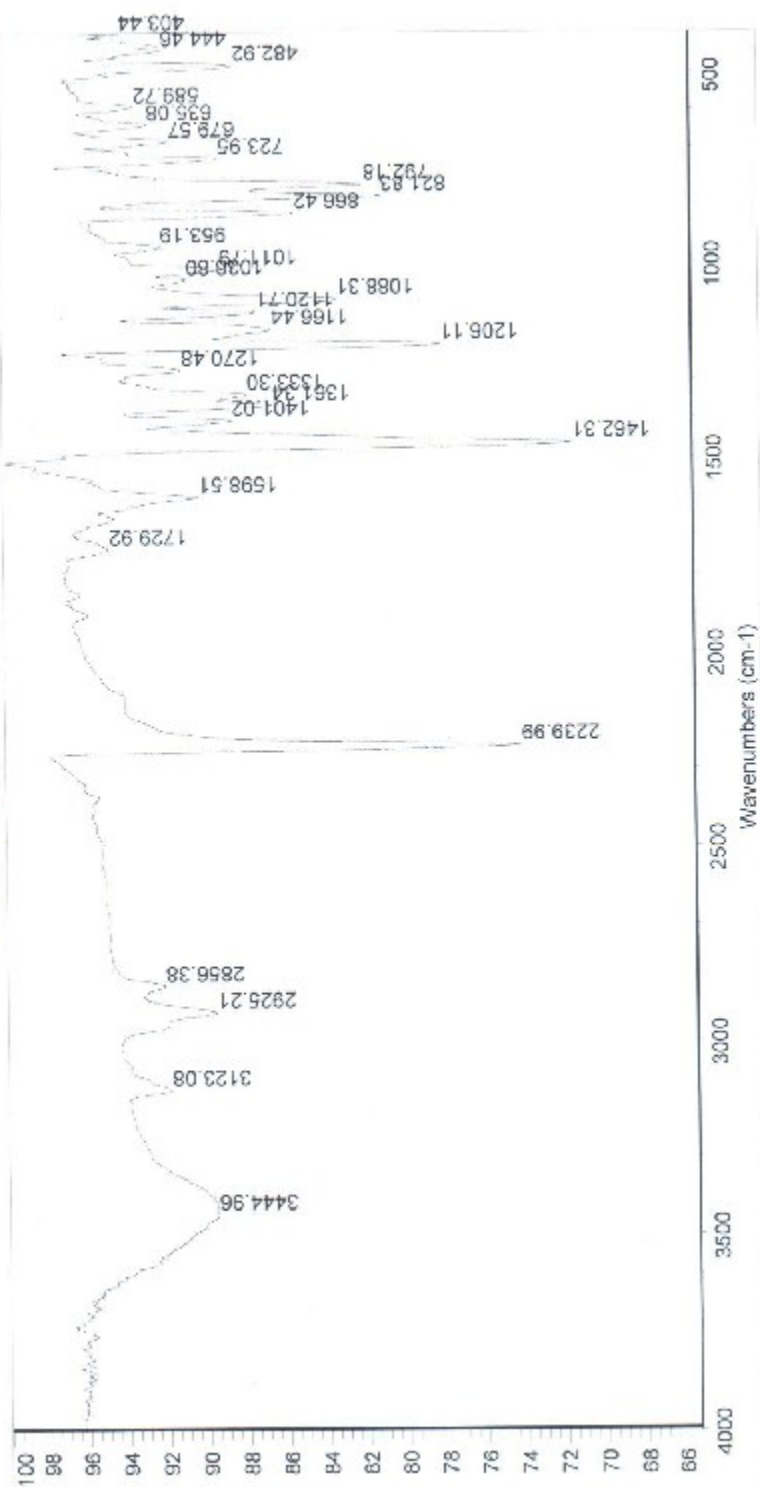

Sample Name: R1-MCL [KBr]

Sample Preparation:

Collection time: Thu Mar 02 13:03:37 2017 (GMT+05:30)

Bench: Thermo Nicolet Nexus 670 Spectrometer

Resolution: 4cm<sup>-1</sup>

Detector: DTGS KB

Beamsplitter: KBr

Source: IR

Analyst Name:

R Spectrum of 4cl

Indian Institute of Chemical Technology, Hyderabad  
 FT-IR Analysis Report

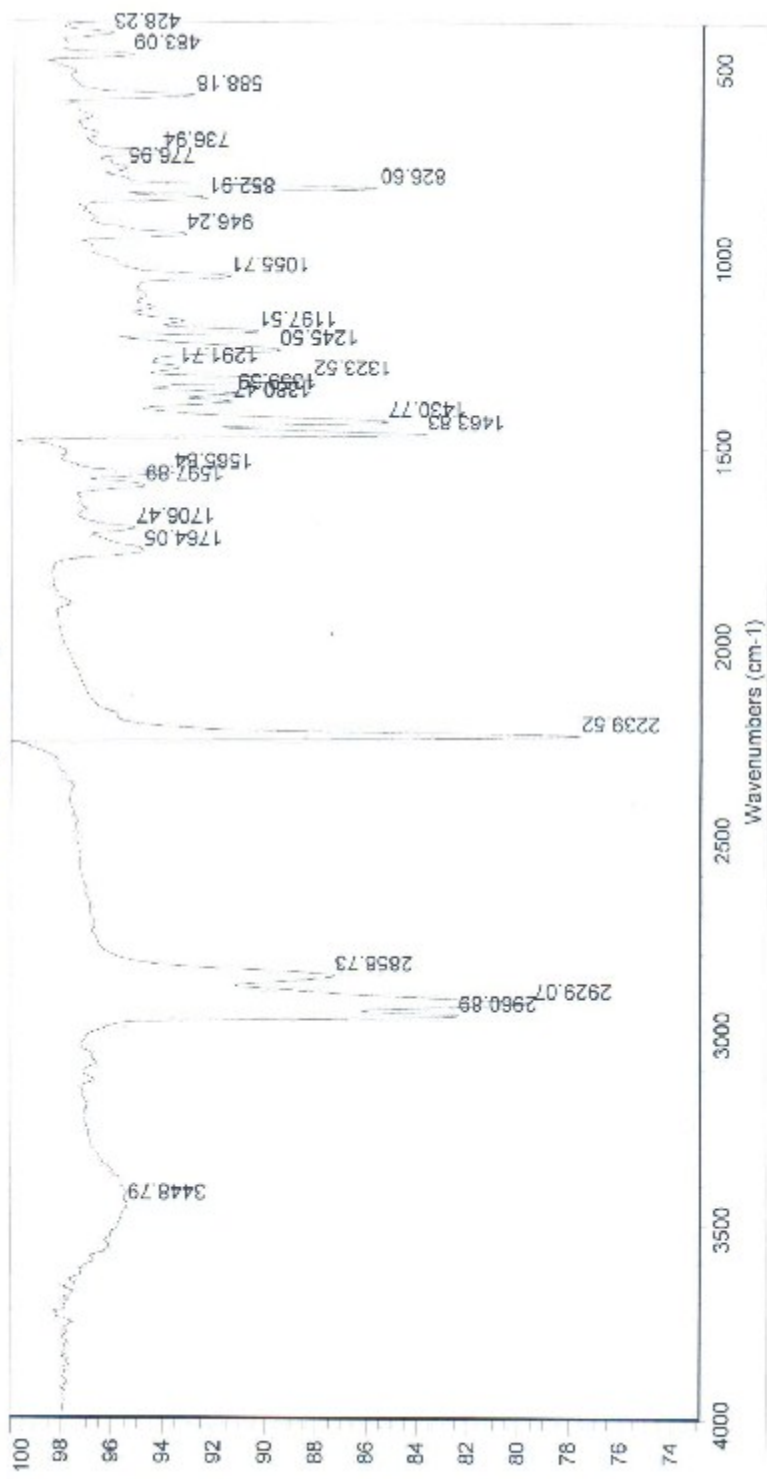

Sample Name: RI-CL-HX [NEAT]

Sample Preparation:

Collection time: Mon Mar 08 12:12:05 2017 (GMT+05:30)

Bench: Thermo Nicolet Nexus 870 Spectrometer

Resolution: 4cm-1

Detector: DTGS KB

Beamsplitter: KBr

Source: IR

Analyst Name:

R Spectrum of 4da

Indian Institute of Chemical Technology, Hyderabad  
FT-IR Analysis Report

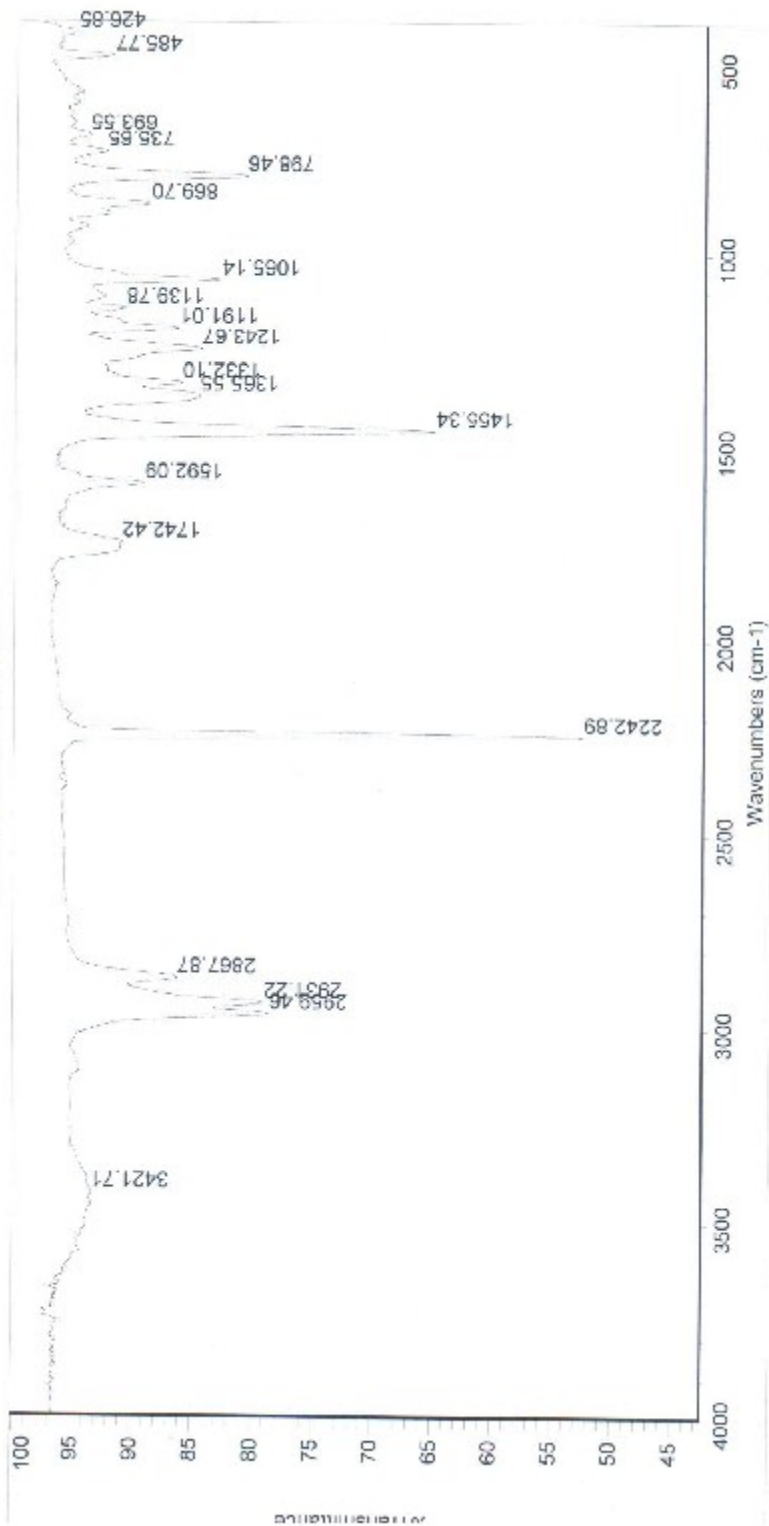

Sample Name: RT-4CLHEX [KBr]

Sample Preparation:

Collection time: Tue Mar 14 15:14:07 2017 (GMT+05:30)

Bench: Thermo Nicolet Nexus 670 Spectrometer

Resolution: 4cm-1

Detector: DTGS KB

Beamsplitter: KBr

Source: IR

Analyst Name:

R Spectrum of 4ea

Indian Institute of Chemical Technology, Hyderabad  
 FT-IR Analysis Report

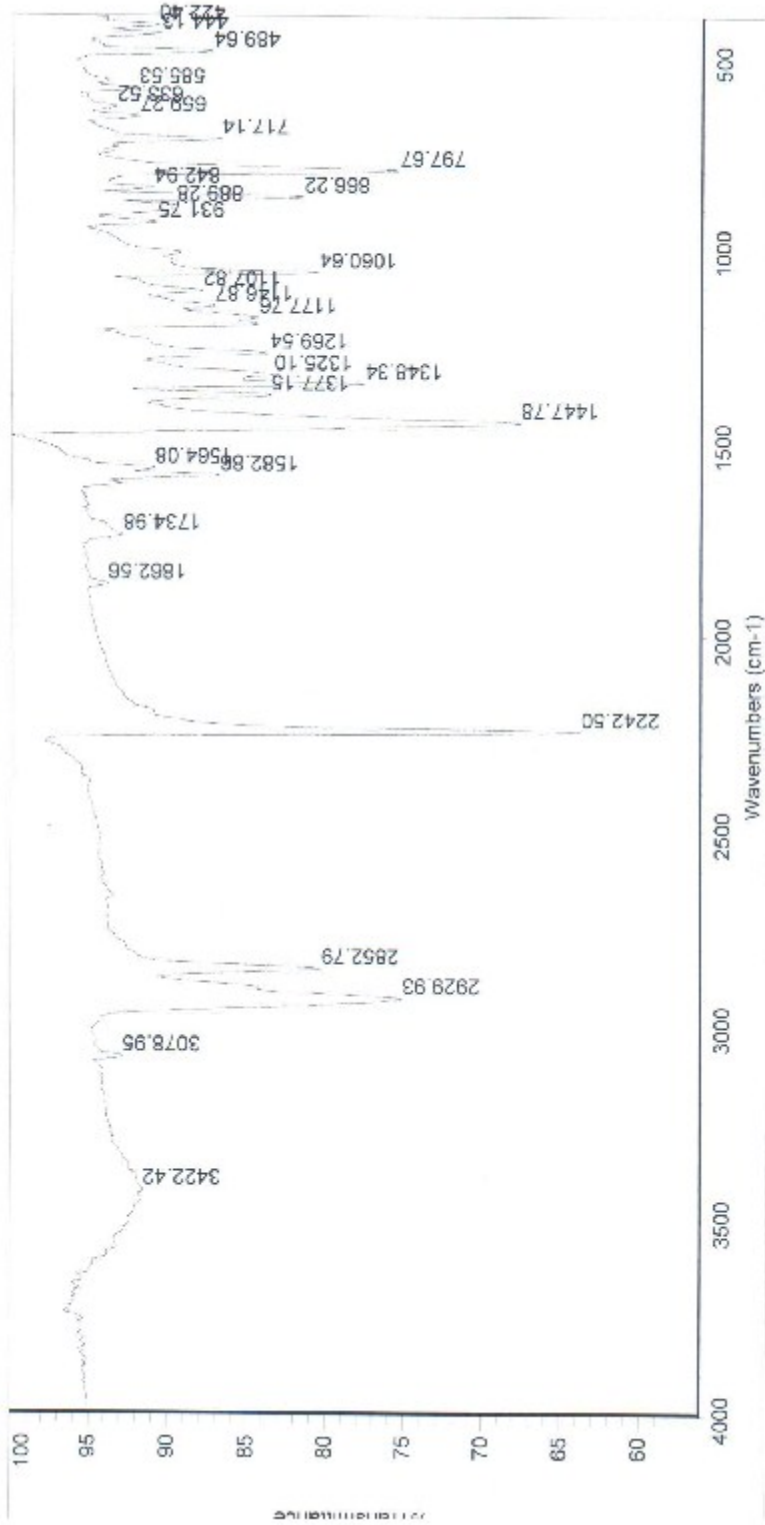

Sample Name: PRL-4CLCYH [KBr]

Sample Preparation:

Collection time: Tue Mar 14 12:26:50 2017 (GMT+05:30)

Branch: Thermo Nicolet Nexus 670 Spectrometer

Resolution: 4cm-1

Detector: DTGS KB

Beamsplitter: KBr

Source: IR

Analyst Name:

R Spectrum of 4ee



Indian Institute of Chemical Technology, Hyderabad  
 FT-IR Analysis Report

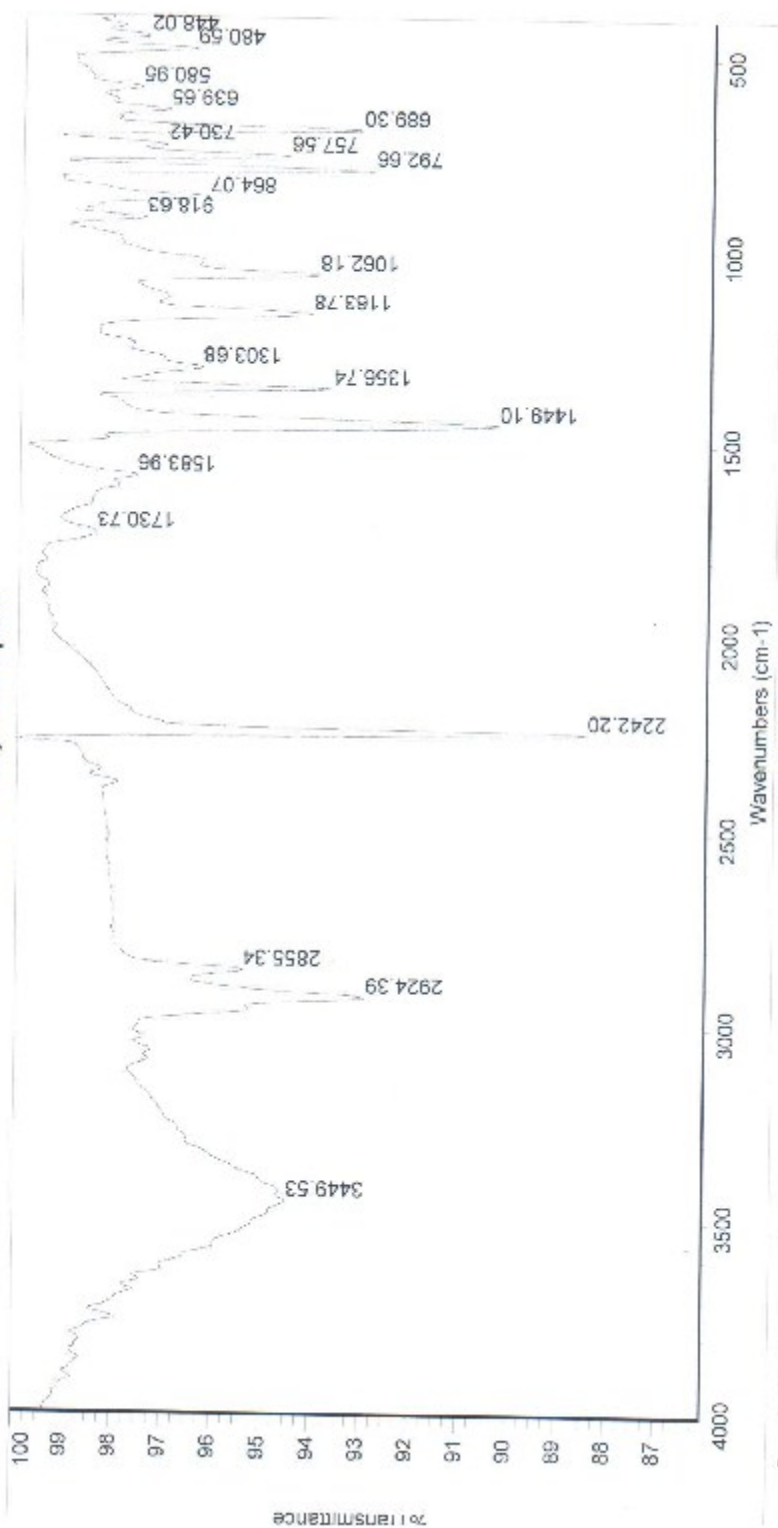

Sample Name: PRL\_4CLPH [KBr]

Sample Preparation:

Collection time: Tue Mar 14 12:32:50 2017 (GMT+05:30)

Bench: Thermo Nicolet Nexus 670 Spectrometer

Resolution: 4cm-1

Detector: DTGS KB

Beam Splitter: KBr

Source: IR

Analyst Name:

R Spectrum of 4eh
