# Supplementary material for: Silver(i) catalyzed intramolecular cyclization of N-(2-(alk-1-yn-1-yl))-1H-tetrazoles leading to the formation of N-cyano-2-substituted indoles under ambient conditions
Source: Royal Society of Chemistry journal article supplement (doi:10.1039/c7qo00109f), 2017-01-01
Supplement: c7qo00109f2.pdf [file c7qo00109f2.pdf]

## Supporting Information

# **Silver(I) Catalyzed Intramolecular Cyclization of N-(2-(alk-1-yn-1-yl))Tetrazoles leading to the formation of N-cyano-2-substituted Indoles under ambient conditions**

Sangeetha Panaka,<sup>a, b</sup> Rajiv Trivedi,<sup>a, b\*</sup> T. Sony,<sup>c</sup> S. Prabhakar,<sup>c</sup> L. Raju Chowhan<sup>d</sup>

<sup>a</sup>*Inorganic and Physical Chemistry Division, CSIR-Indian Institute of Chemical Technology, Hyderabad 500007, Telangana, India, [trivedi@iict.res.in](mailto:trivedi@iict.res.in), Fax: +91-40-2716-0921; Tel: +91-40-2719-1667*

<sup>b</sup>*Academy of Scientific and Innovative Research, AcSIR CSIR-IICT Campus, Hyderabad, 500007*

<sup>c</sup>*Analytical Chemistry and Mass spectrometry Division, CSIR-Indian Institute of Chemical Technology, Hyderabad 500007, Telangana, India*

<sup>d</sup>*School of Chemical Sciences, Central University of Gujarat, Sector 30, Gandhinagar, Gujarat - 382030, India*

### Table of content:

|          |                                                      |       |
|----------|------------------------------------------------------|-------|
| <b>1</b> | MASS (ESI) Spectrum of compounds ( <b>3aa- 3ee</b> ) | 2- 30 |
|----------|------------------------------------------------------|-------|

## HR- ESI MASS SPECTRUM OF (3)

|             |                         |                        |         |                 |                     |
|-------------|-------------------------|------------------------|---------|-----------------|---------------------|
| Sample Name | RT-201                  | Position               | P1-A11  | Instrument Name | ACMS LC QTOF        |
| User Name   | LCHSQTOF-PC\Analyst     | Inj Vol                | 0.025   | InjPosition     |                     |
| Sample Type | Sample                  | IRM Calibration Status | Success | Data Filename   | RT-201.d            |
| ACQ Method  | SONY-AG-FS-21-03-2017.m | Comment                |         | Acquired Time   | 21-03-2017 12:32:53 |

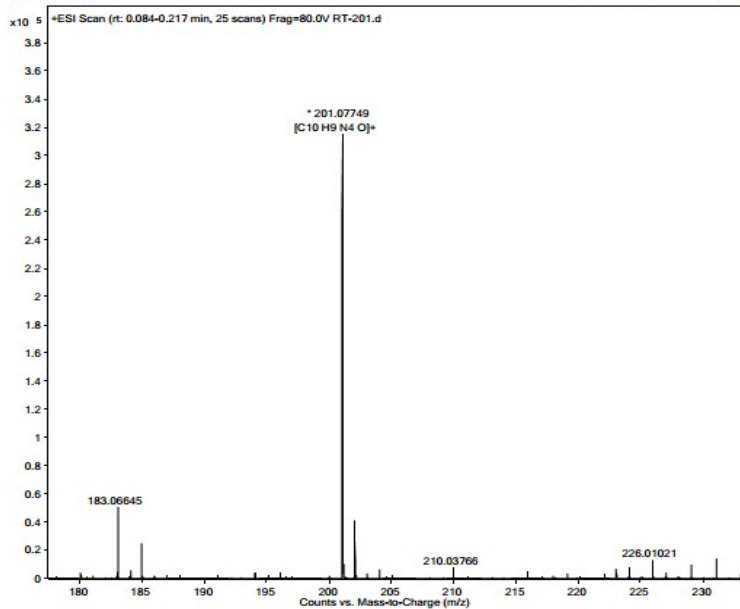

**HRMS Spectrum of 3bp**

|             |                         |                        |         |                 |                     |
|-------------|-------------------------|------------------------|---------|-----------------|---------------------|
| Sample Name | RT-211                  | Position               | P1-B7   | Instrument Name | ACHS LC QTOF        |
| User Name   | LCMSQTOF-PC/Analyst     | Inj Vol                | 0.025   | InjPosition     |                     |
| Sample Type | Sample                  | IRM Calibration Status | Success | Data Filename   | RT-211.d            |
| ACQ Method  | SONY-AG-FS-21-03-2017.m | Comment                |         | Acquired Time   | 21-03-2017 12:48:56 |

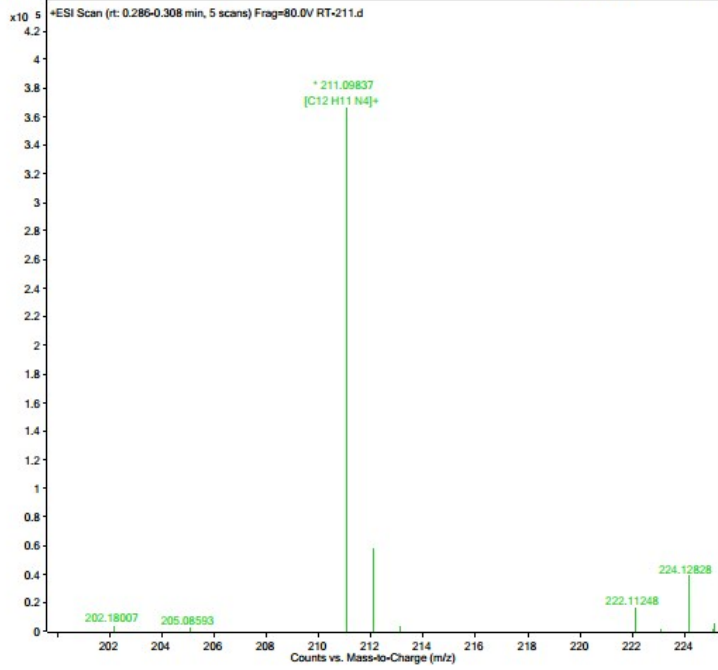

**HRMS Spectrum of 3bg**

|             |                         |                        |         |                 |                     |
|-------------|-------------------------|------------------------|---------|-----------------|---------------------|
| Sample Name | RT-213                  | Position               | P1-B2   | Instrument Name | ACMS LC QTOF        |
| User Name   | LCMSQTOF-PC\Analyst     | Inj Vol                | 0.025   | InjPosition     |                     |
| Sample Type | Sample                  | IRM Calibration Status | Success | Data Filename   | RT-213.d            |
| ACQ Method  | SONY-AG-FS-21-03-2017.m | Comment                |         | Acquired Time   | 21-03-2017 12:38:57 |

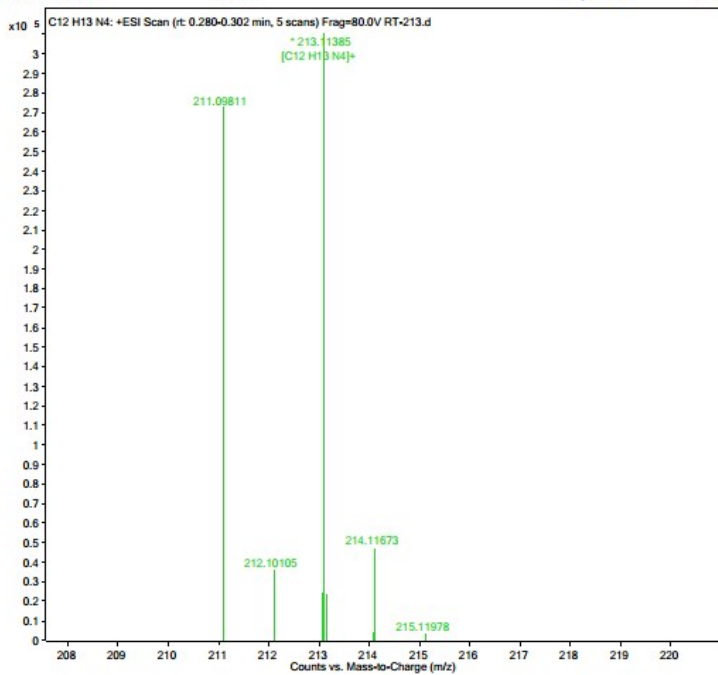

**HRMS Spectrum of 3bc**

|             |                         |                        |         |                 |                     |
|-------------|-------------------------|------------------------|---------|-----------------|---------------------|
| Sample Name | RT-227                  | Position               | P1-A6   | Instrument Name | ACMS LC QTOF        |
| User Name   | LCMSQTOF-PC\Analyst     | Inj Vol                | 0.025   | InjPosition     |                     |
| Sample Type | Sample                  | IRM Calibration Status | Success | Data Filename   | RT-227.d            |
| ACQ Method  | SONY-AG-FS-21-03-2017.m | Comment                |         | Acquired Time   | 21-03-2017 12:22:49 |

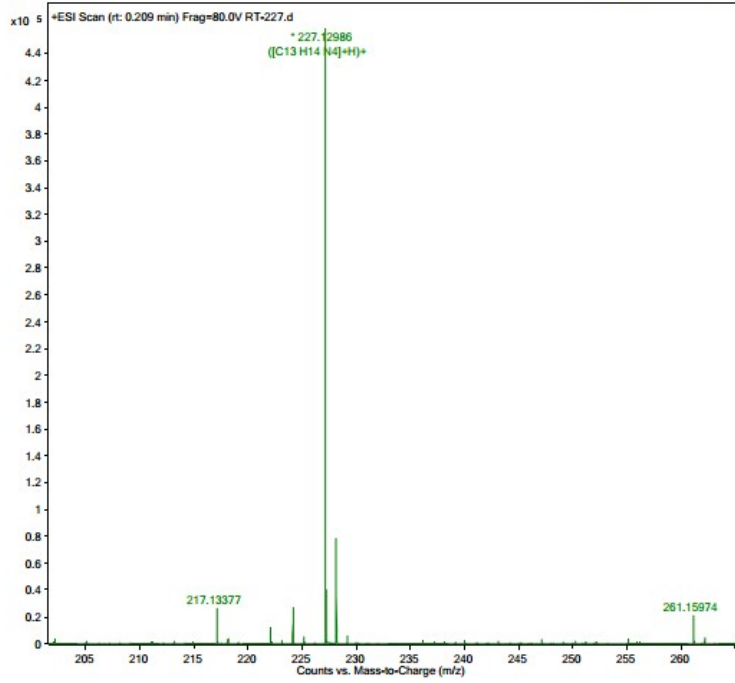

**HRMS Spectrum of 3ba**

|             |                         |                        |         |                 |                     |
|-------------|-------------------------|------------------------|---------|-----------------|---------------------|
| Sample Name | RT-239                  | Position               | P1-A10  | Instrument Name | ACMS LC QTOF        |
| User Name   | LCMSQTOF-PC\Analyst     | Inj Vol                | 0.025   | InjPosition     |                     |
| Sample Type | Sample                  | IRM Calibration Status | Success | Data Filename   | RT-239.d            |
| ACQ Method  | SONY-AG-FS-21-03-2017.m | Comment                |         | Acquired Time   | 21-03-2017 12:30:50 |

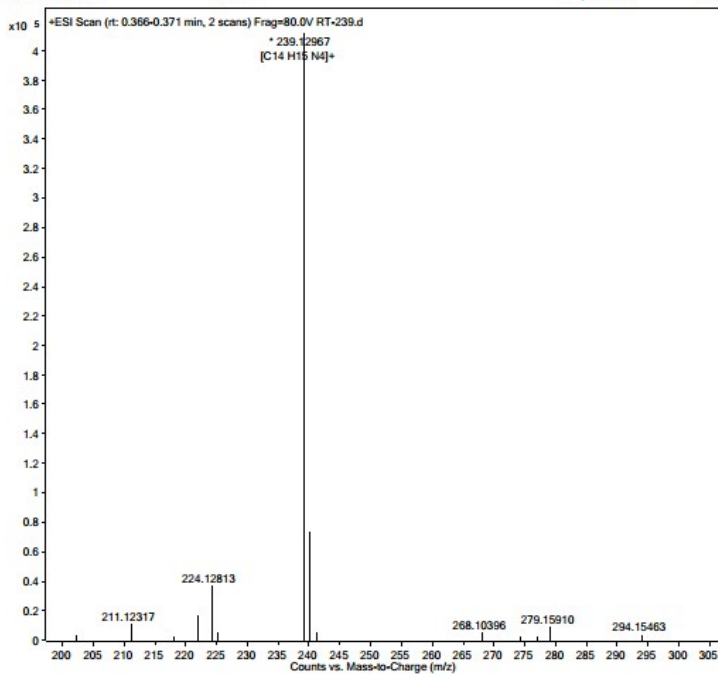

**HRMS Spectrum of 3bf**

|             |                         |                        |         |                 |                     |
|-------------|-------------------------|------------------------|---------|-----------------|---------------------|
| Sample Name | RT-247                  | Position               | P1-B5   | Instrument Name | ACMS LC QTOF        |
| User Name   | LCMSQTOF-PC\Analyst     | Inj Vol                | 0.025   | InjPosition     |                     |
| Sample Type | Sample                  | IRM Calibration Status | Success | Data Filename   | RT-247.d            |
| ACQ Method  | SONY-AG-FS-21-03-2017.m | Comment                |         | Acquired Time   | 21-03-2017 12:44:55 |

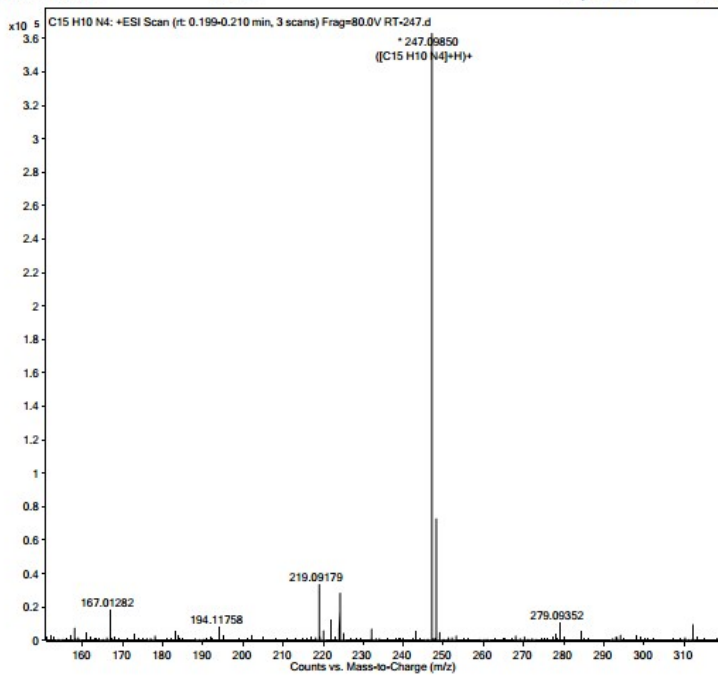

**HRMS Spectrum of 3bh**

|             |                         |                        |         |                 |                     |
|-------------|-------------------------|------------------------|---------|-----------------|---------------------|
| Sample Name | RT-253                  | Position               | P1-03   | Instrument Name | ACMS LC QTOF        |
| User Name   | LCMSQTOF-PC\Analyst     | Inj Vol                | 0.025   | InjPosition     |                     |
| Sample Type | Sample                  | IRM Calibration Status | Success | Data Filename   | RT-253.d            |
| ACQ Method  | SONY-AG-F5-21-03-2017.m | Comment                |         | Acquired Time   | 21-03-2017 12:40:55 |

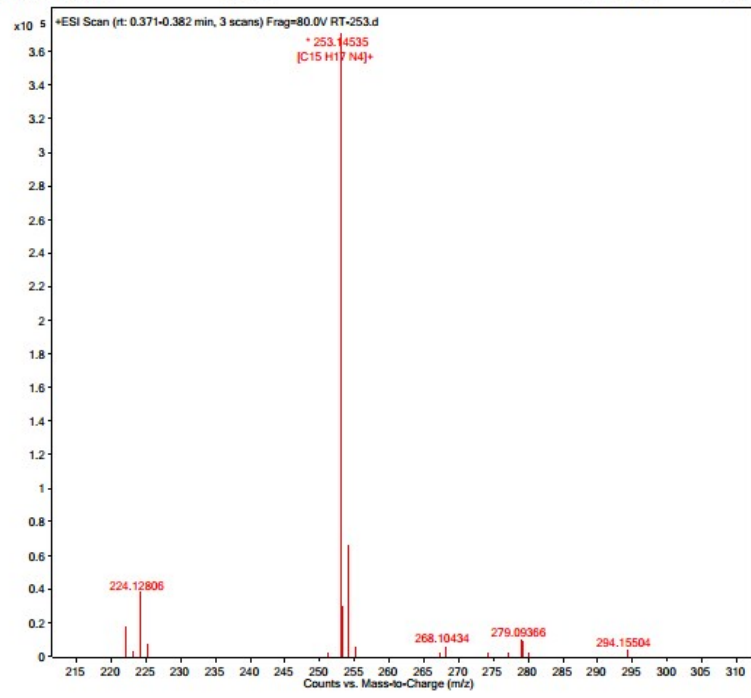

HRMS Spectrum of 3be



|             |                         |                        |         |                 |                     |
|-------------|-------------------------|------------------------|---------|-----------------|---------------------|
| Sample Name | RT-255                  | Position               | P1-A5   | Instrument Name | ACHS LC QTOF        |
| User Name   | LCMSQTOF-PC\Analyst     | Inj Vol                | 0.025   | InjPosition     |                     |
| Sample Type | Sample                  | IRM Calibration Status | Success | Data Filename   | RT-255.d            |
| ACQ Method  | SONY-AG-F5-21-03-2017.m | Comment                |         | Acquired Time   | 21-03-2017 12:20:50 |

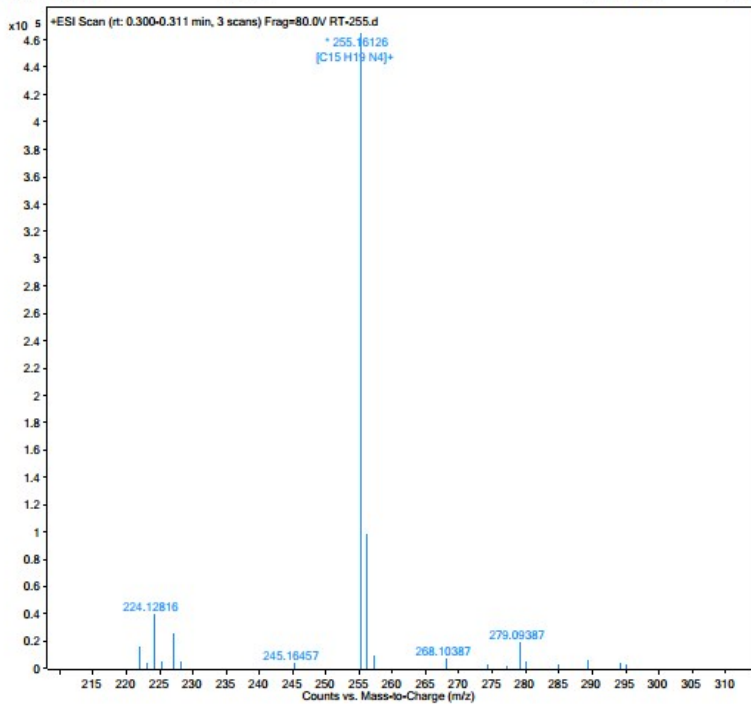

**HRMS Spectrum of 3bb**

|             |                         |                        |         |                 |                     |
|-------------|-------------------------|------------------------|---------|-----------------|---------------------|
| Sample Name | RT-257                  | Position               | P1-A8   | Instrument Name | ACMS LC QTOF        |
| User Name   | LCMSQTOF-PC\Analyst     | Inj Vol                | 0.025   | InjPosition     |                     |
| Sample Type | Sample                  | IRM Calibration Status | Success | Data Filename   | RT-257.d            |
| ACQ Method  | SONY-AG-FS-21-03-2017.m | Comment                |         | Acquired Time   | 21-03-2017 12:26:47 |

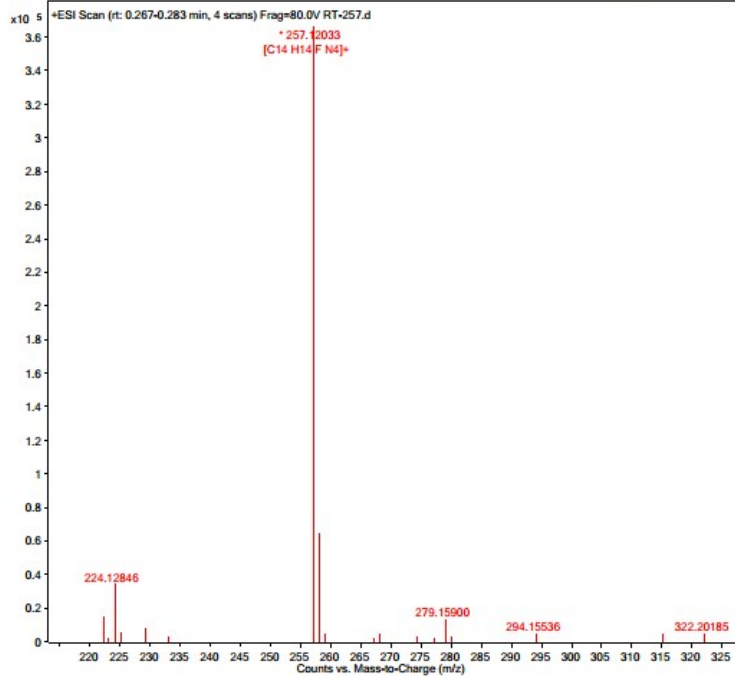

## HRMS Spectrum of 3af

|             |                         |                        |         |                 |                     |
|-------------|-------------------------|------------------------|---------|-----------------|---------------------|
| Sample Name | RT-264                  | Position               | P1-C1   | Instrument Name | ACMS LC QTOF        |
| User Name   | LCMSQTOF-PC/Analyst     | Inj Vol                | 0.025   | InjPosition     |                     |
| Sample Type | Sample                  | IRM Calibration Status | Success | Data Filename   | RT-264.d            |
| ACQ Method  | SONY-AG-FS-21-03-2017.m | Comment                |         | Acquired Time   | 21-03-2017 13:00:57 |

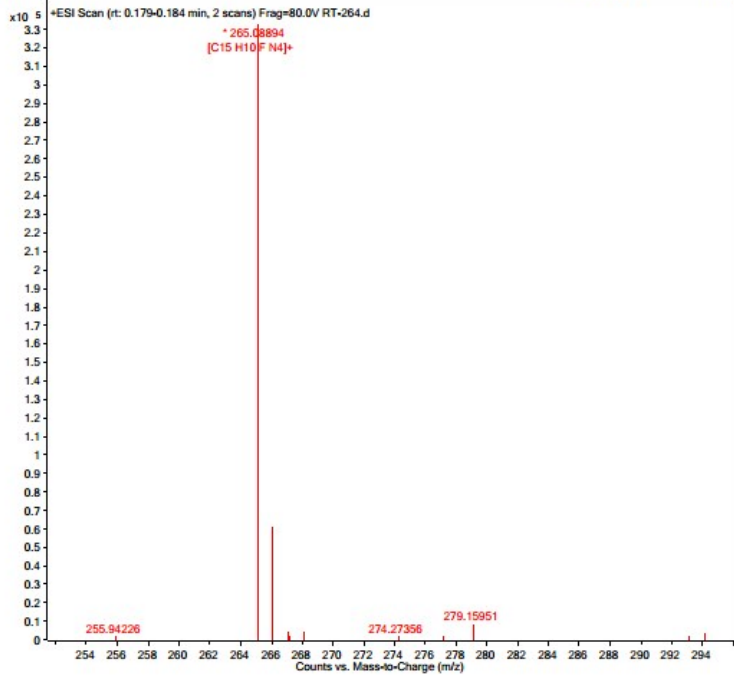

**HRMS Spectrum of 3bk**

|             |                         |                        |         |                 |                     |
|-------------|-------------------------|------------------------|---------|-----------------|---------------------|
| Sample Name | RT-277                  | Position               | P1-B1   | Instrument Name | ACMS LC QTOF        |
| User Name   | LCMSQTOF-PC\Analyst     | Inj Vol                | 0.025   | InjPosition     |                     |
| Sample Type | Sample                  | IRM Calibration Status | Success | Data Filename   | RT-277.d            |
| ACQ Method  | SONY-AG-F5-21-03-2017.m | Comment                |         | Acquired Time   | 21-03-2017 12:36:57 |

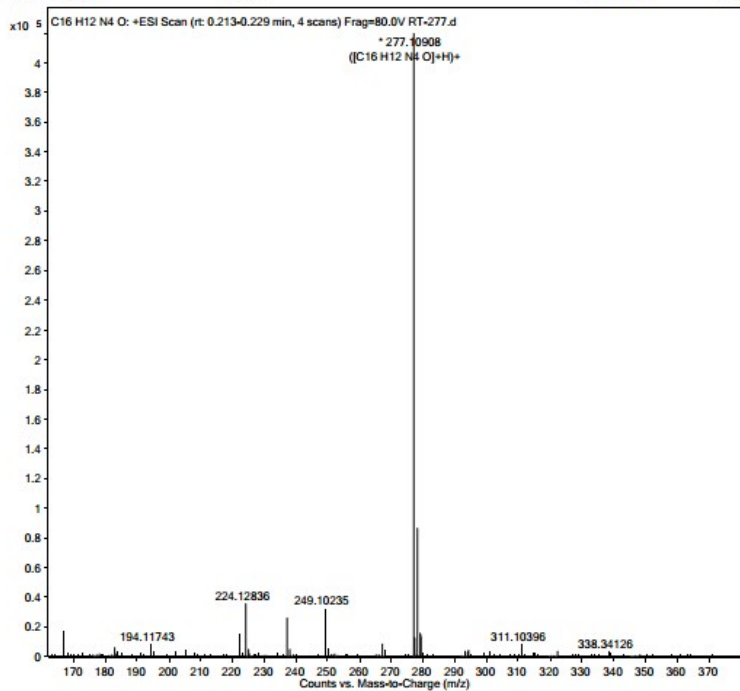

**HRMS Spectrum of 3bn**

|             |                         |                        |         |                 |                     |
|-------------|-------------------------|------------------------|---------|-----------------|---------------------|
| Sample Name | RT-303                  | Position               | P1-B9   | Instrument Name | ACHS LC QTOF        |
| User Name   | LCMSQTOF-PC/Analyst     | Inj Vol                | 0.025   | InjPosition     |                     |
| Sample Type | Sample                  | IRM Calibration Status | Success | Data Filename   | RT-303.d            |
| ACQ Method  | SONY-AG-FS-21-03-2017.m | Comment                |         | Acquired Time   | 21-03-2017 12:54:55 |

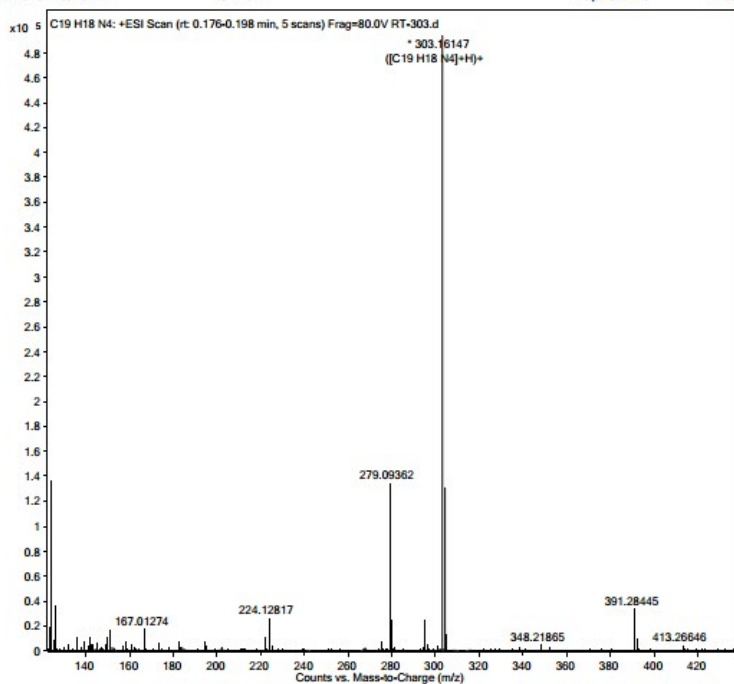

**HRMS Spectrum of 3bi**

|             |                         |                        |         |                 |                     |
|-------------|-------------------------|------------------------|---------|-----------------|---------------------|
| Sample Name | RT-265-R                | Position               | P1-B8   | Instrument Name | ACHS LC QTOF        |
| User Name   | LCMSQTOF-PC\Analyst     | Inj Vol                | 0.025   | InjPosition     |                     |
| Sample Type |                         | IRM Calibration Status | Success | Data Filename   | RT-265-R.d          |
| ACQ Method  | SONY-AG-FS-21-03-2017.m | Comment                |         | Acquired Time   | 21-03-2017 12:52:55 |

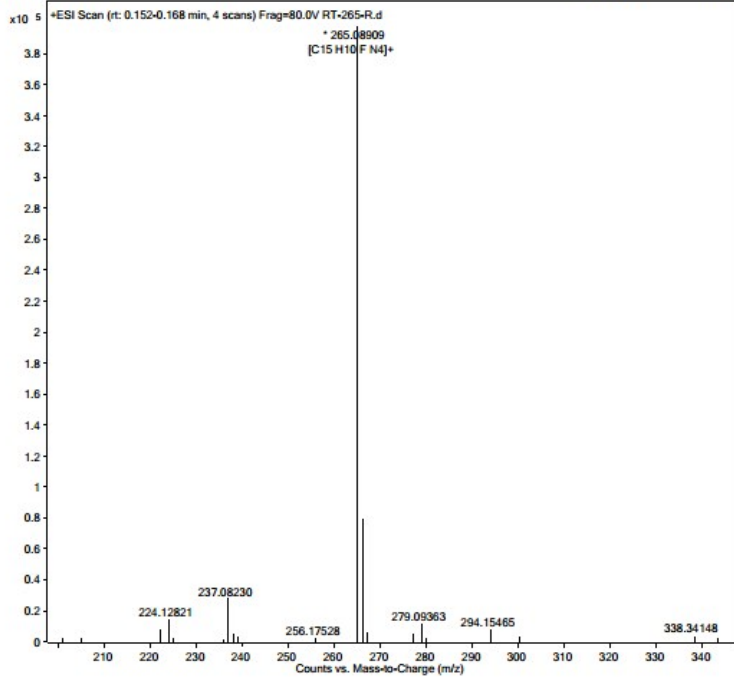

**HRMS Spectrum of 3ah**

|             |                         |                        |         |                 |                     |
|-------------|-------------------------|------------------------|---------|-----------------|---------------------|
| Sample Name | RT-333                  | Position               | P1-A9   | Instrument Name | ACMS LC QTOF        |
| User Name   | LCHSQTOF-PC\Analyst     | Inj Vol                | 0.025   | InjPosition     |                     |
| Sample Type | Sample                  | IRM Calibration Status | Success | Data Filename   | RT-333.d            |
| ACQ Method  | SONY-AG-F5-21-03-2017.m | Comment                |         | Acquired Time   | 21-03-2017 12:28:48 |

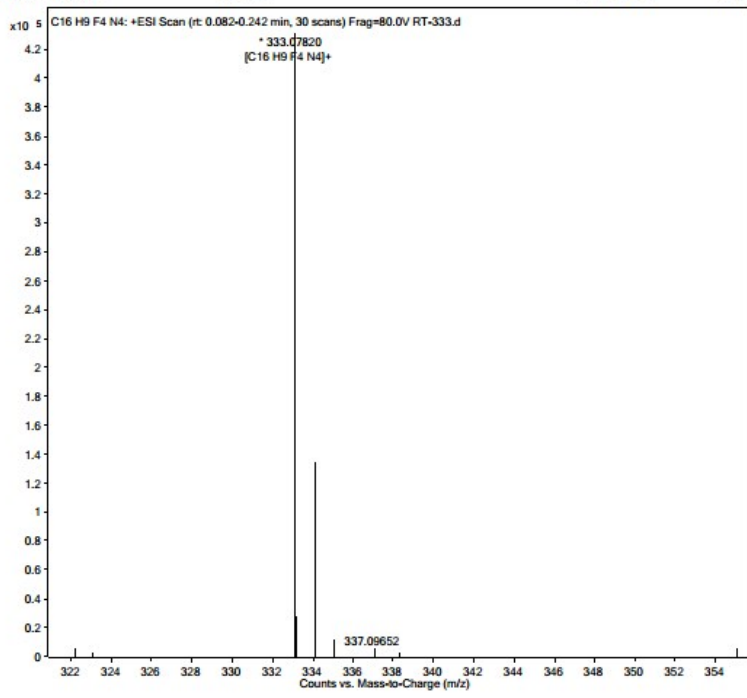

**HRMS Spectrum of 3a**

START-F #18-65 RT: 0.07-0.23 AV: 48 NL: 2.40E5  
T: FTMS (1,1) + p ESI Full ms [50.00-1000.00]

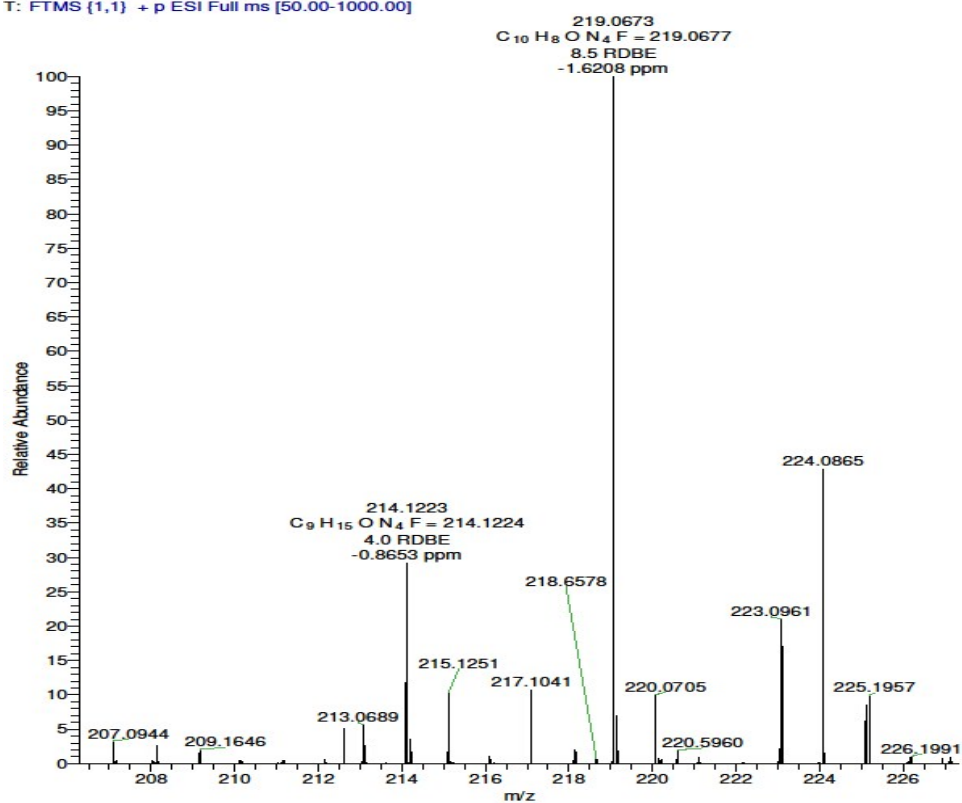

HRMS Spectrum of 3ap



|             |                         |                        |         |                 |                     |
|-------------|-------------------------|------------------------|---------|-----------------|---------------------|
| Sample Name | RT-281                  | Position               | P2-E2   | Instrument Name | ACMS LC QTOF        |
| User Name   | LCHSQTOF-PC/Analyst     | Inj Vol                | 0.1     | Inj Position    |                     |
| Sample Type | Sample                  | IRM Calibration Status | Success | Data Filename   | RT-281.d            |
| ACQ Method  | SONY-AG-F5-21-03-2017.m | Comment                |         | Acquired Time   | 06-04-2017 14:02:25 |

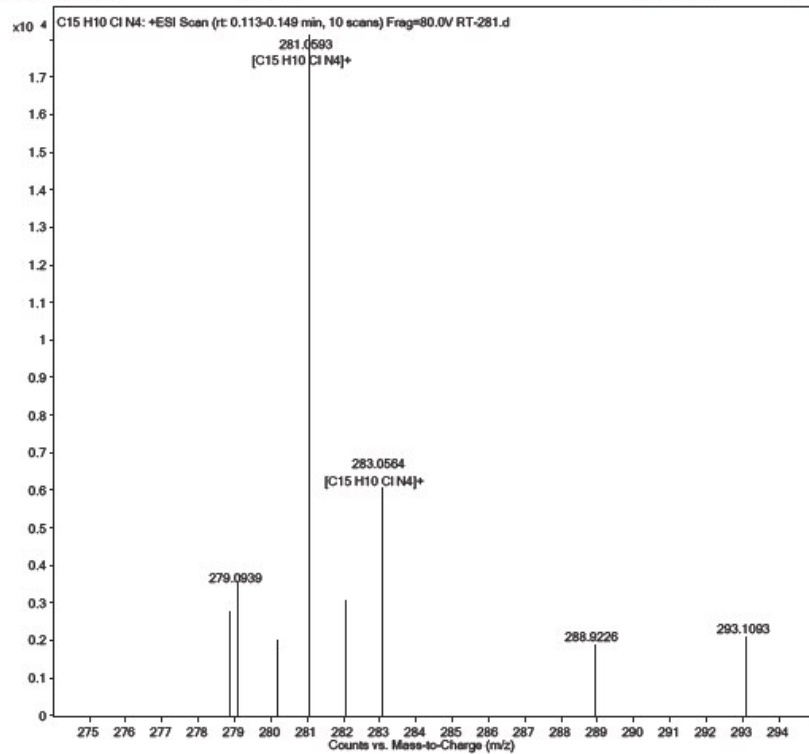

HRMS Spectrum of 3eh

Qualitative Plot Window Report

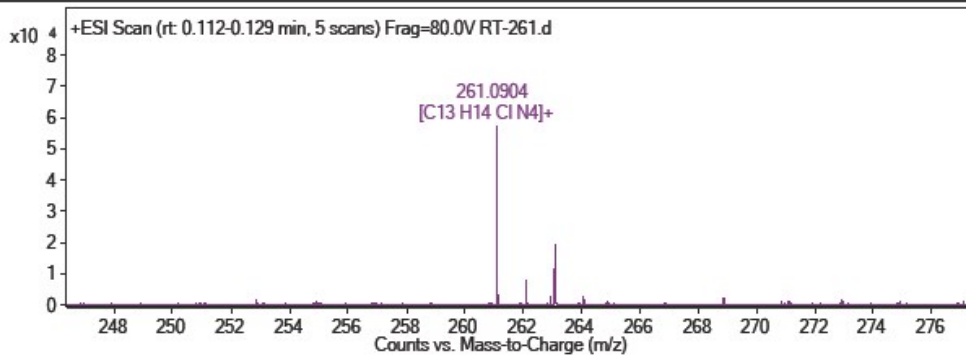

HRMS Spectrum of 3ea

|             |                         |                        |         |                 |                     |
|-------------|-------------------------|------------------------|---------|-----------------|---------------------|
| Sample Name | RT-227                  | Position               | P2-E3   | Instrument Name | ACMS LC QTOF        |
| User Name   | LCMSQTOF-PC/Analyst     | Inj Vol                | 0.1     | InjPosition     |                     |
| Sample Type | Sample                  | IRM Calibration Status | Success | Data Filename   | RT-227.d            |
| ACQ Method  | SONY-AG-F5-21-03-2017.m | Comment                |         | Acquired Time   | 06-04-2017 14:04:26 |

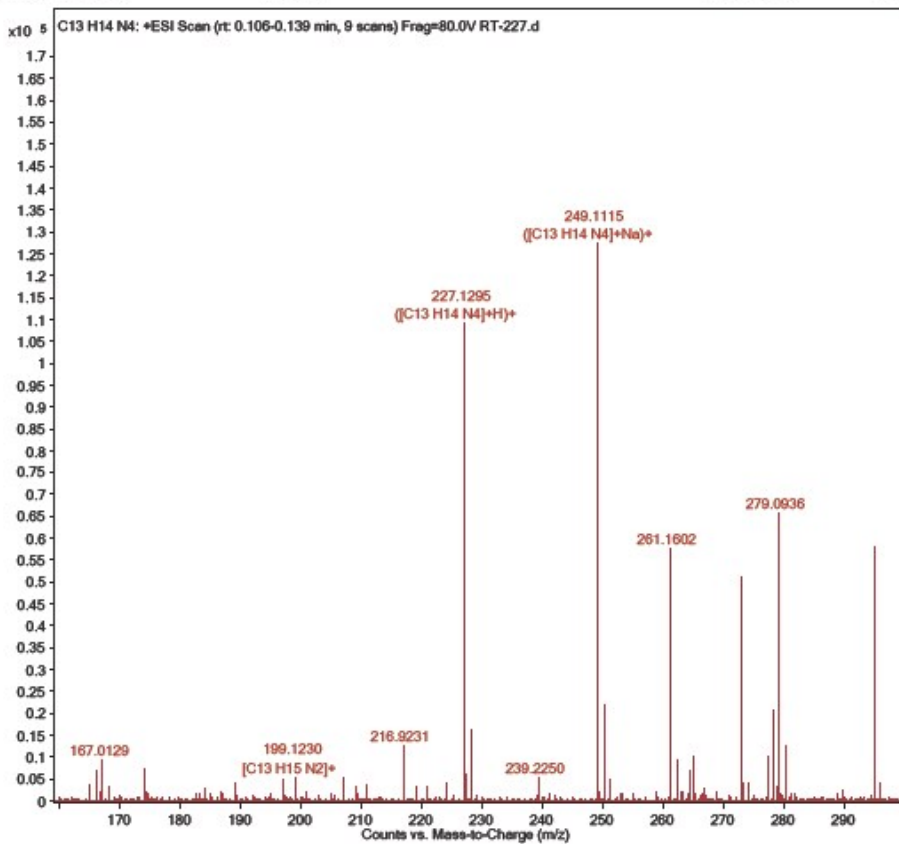

HRMS Spectrum of 3ba

Qualitative Plot Window Report

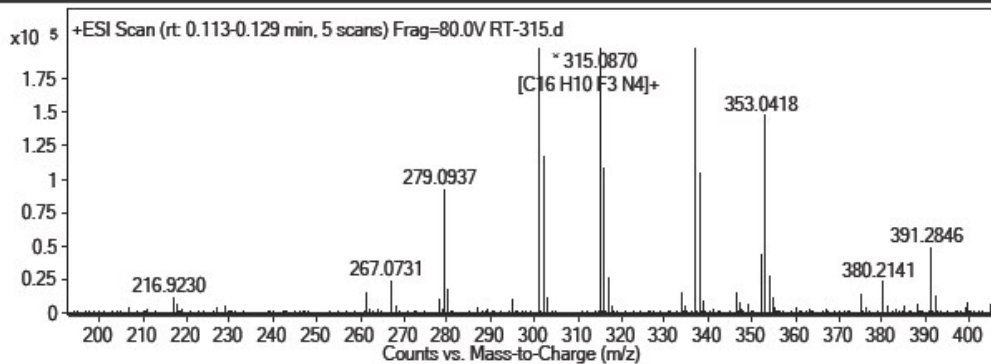

**HRMS Spectrum of 3bl**

|             |                         |                        |         |                 |                     |
|-------------|-------------------------|------------------------|---------|-----------------|---------------------|
| Sample Name | RT-287.5                | Position               | P2-D9   | Instrument Name | ACMS LC QTOF        |
| User Name   | LCHSQTOF-PC/Analyst     | Inj Vol                | 0.1     | Inj Position    |                     |
| Sample Type | Sample                  | IRM Calibration Status | Success | Data Filename   | RT-287.5.d          |
| ACQ Method  | SONY-AG-F5-21-03-2017.m | Comment                |         | Acquired Time   | 06-04-2017 13:54:17 |

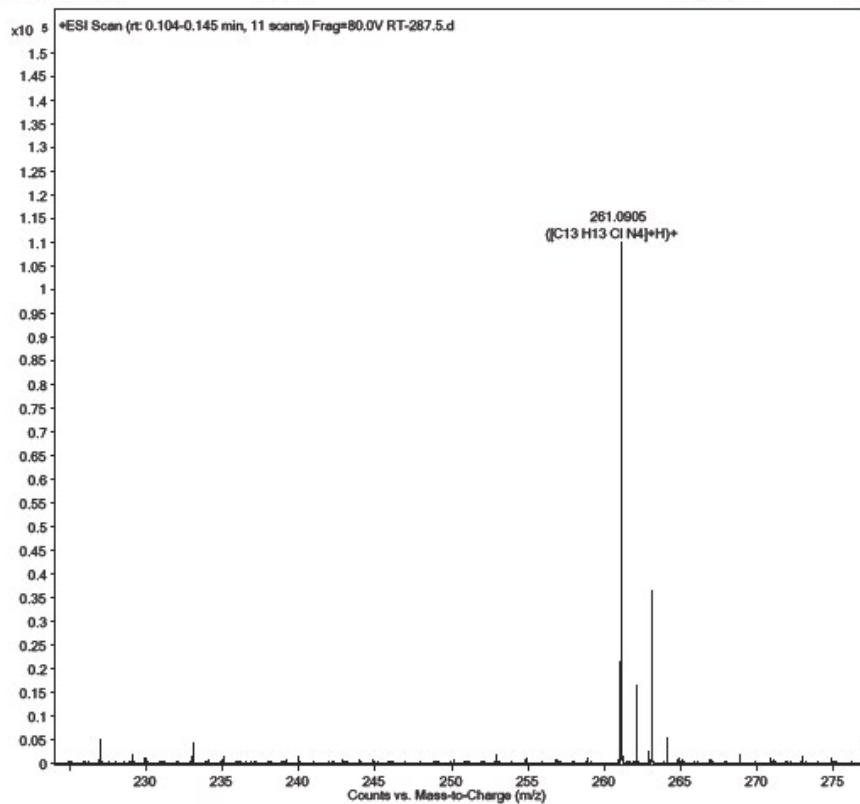

HRMS Spectrum of 3ch

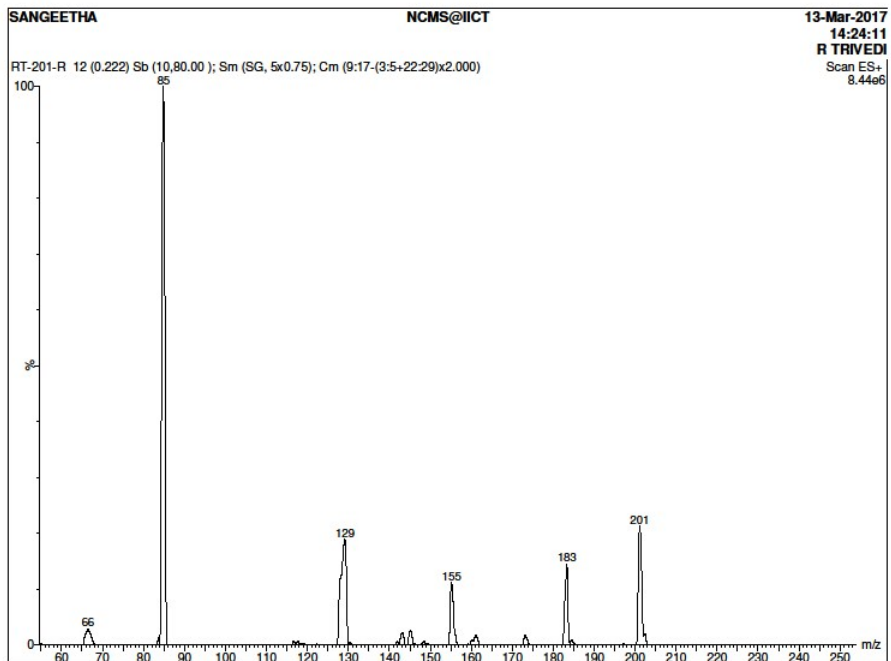

ESI/ MS Spectrum of 3bp

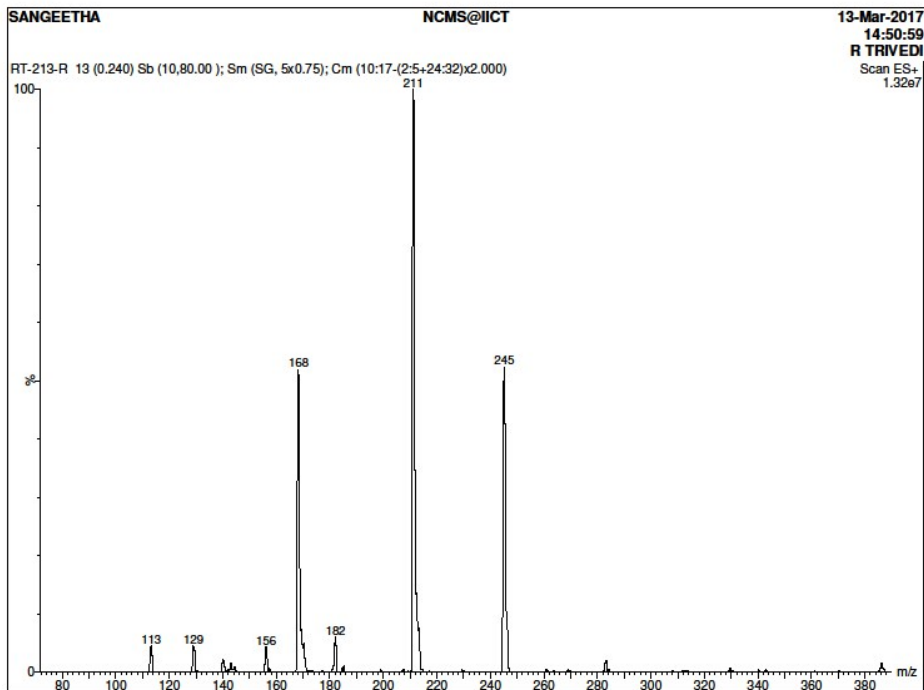

ESI/ MS Spectrum of 3aa

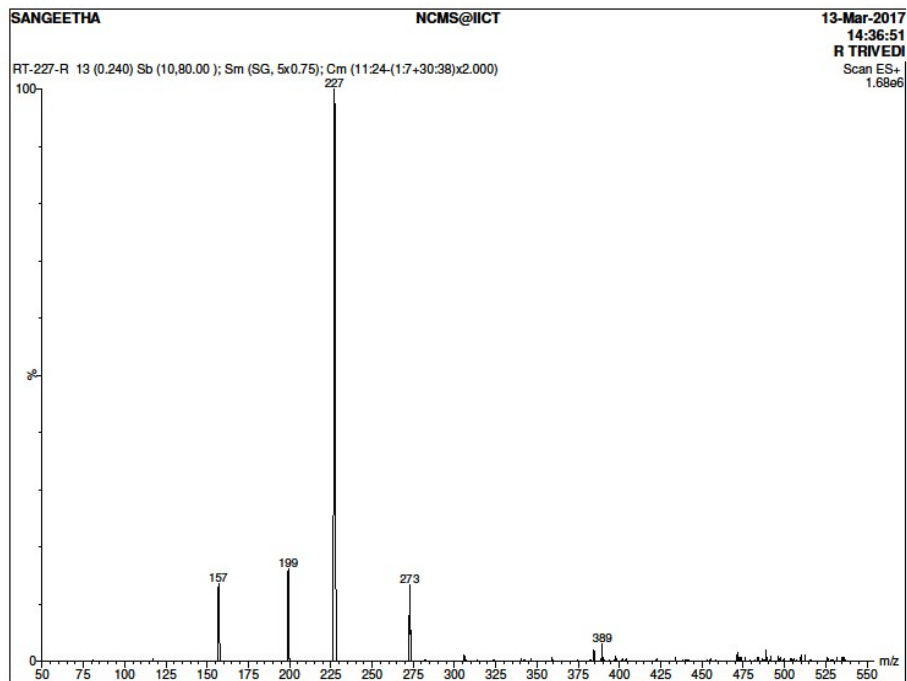

ESI/ MS Spectrum of 3ba

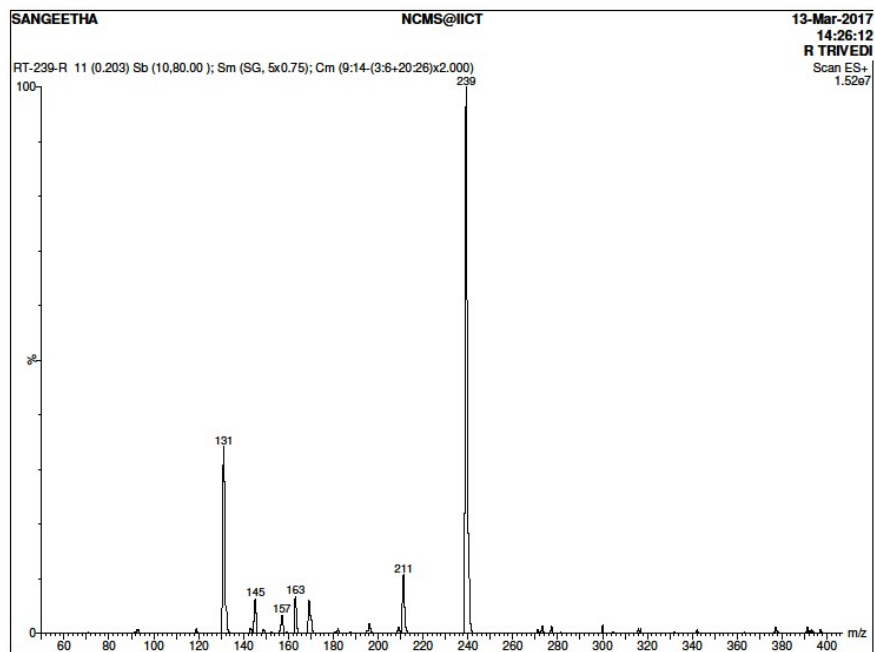

ESI/ MS Spectrum of 3bf

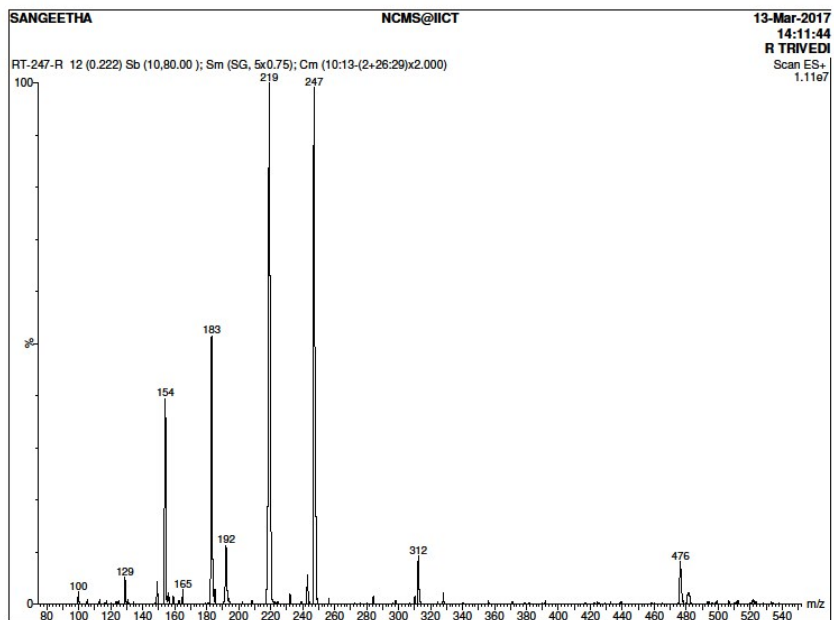

ESI/ MS Spectrum of 3bh

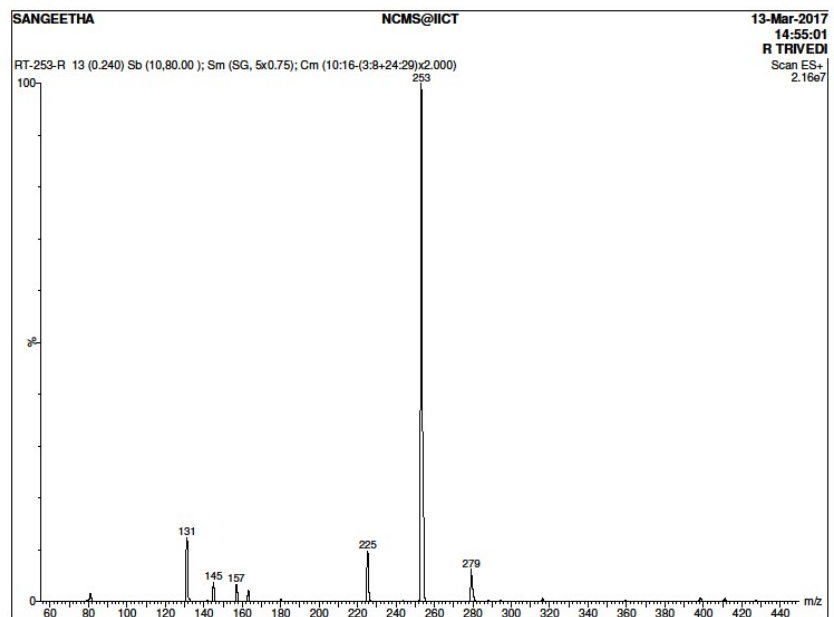

ESI/ MS Spectrum of 3be



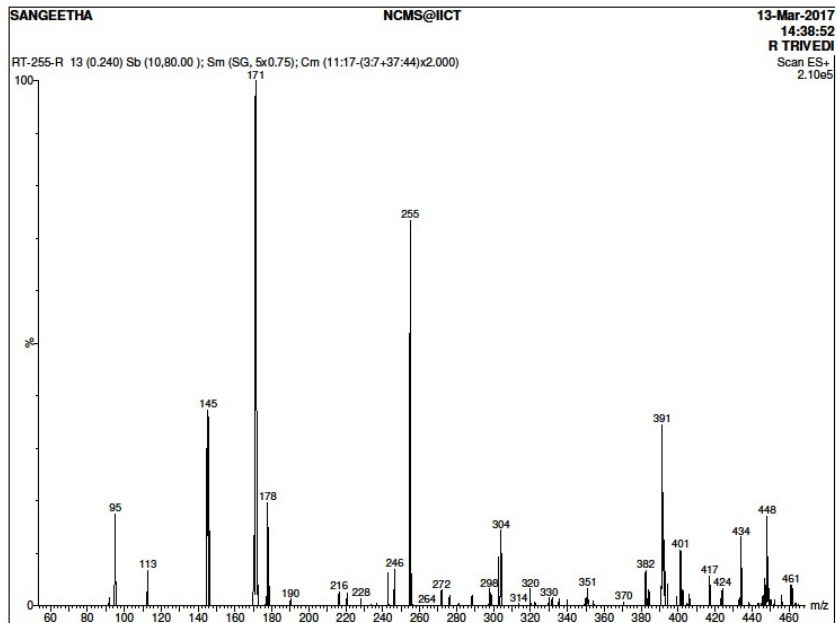

ESI/ MS Spectrum of 3bb

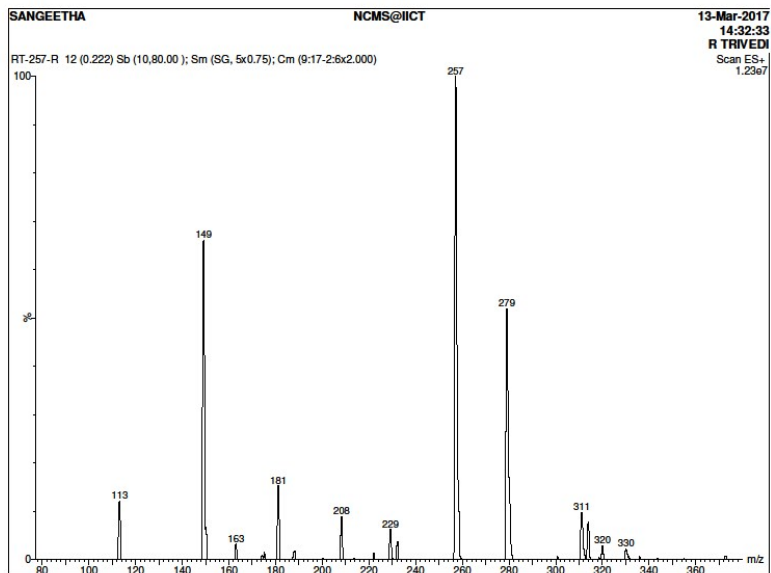

ESI/ MS Spectrum of 3af

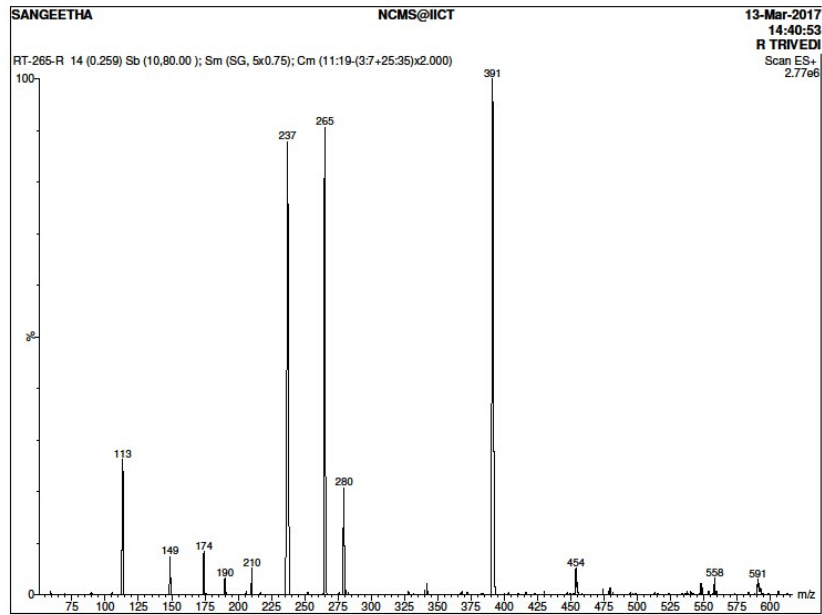

ESI/ MS Spectrum of 3bk

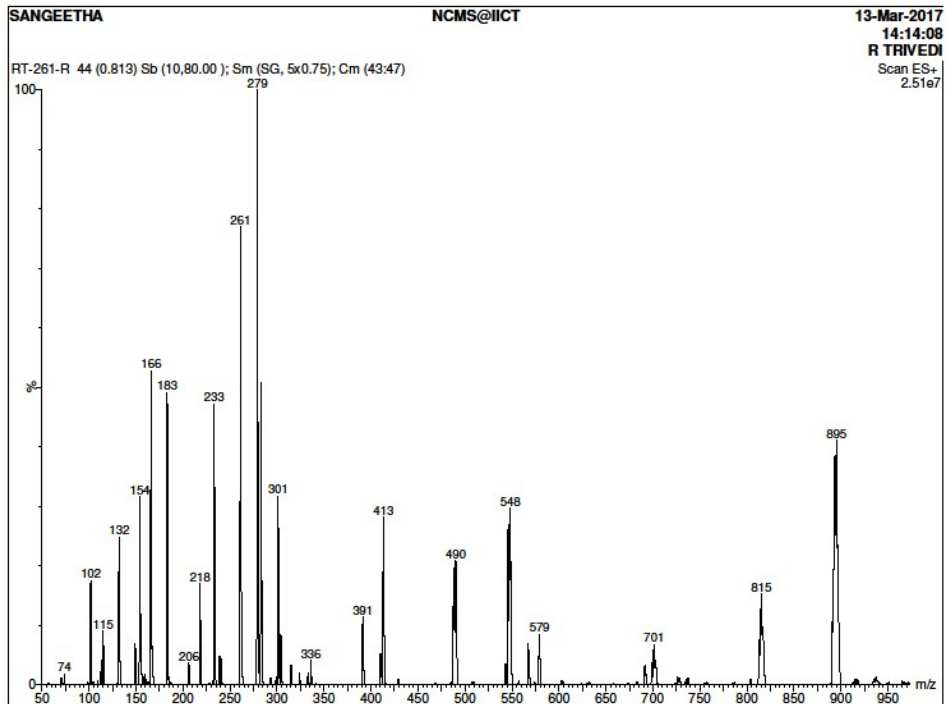

ESI/ MS Spectrum of 3ch

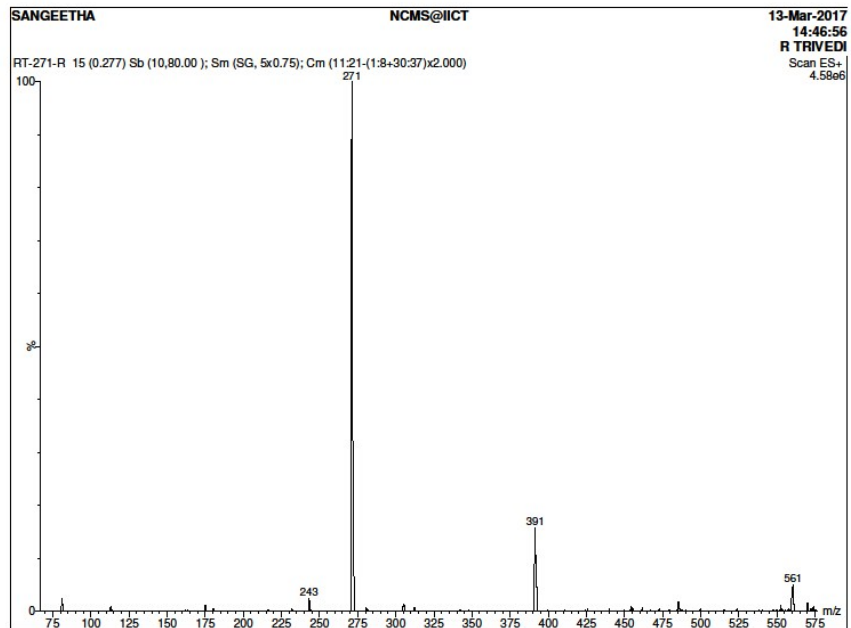

ESI/ MS Spectrum of 3ae

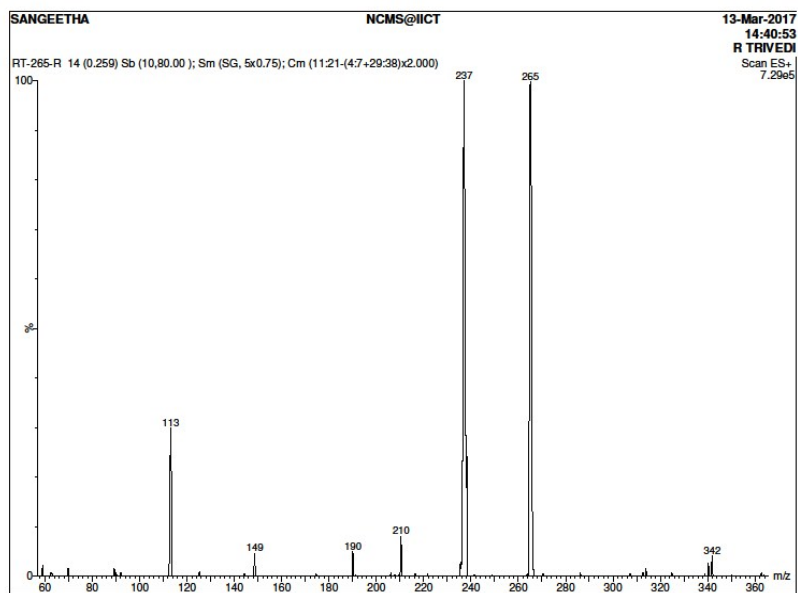

ESI/ MS Spectrum of 3ah

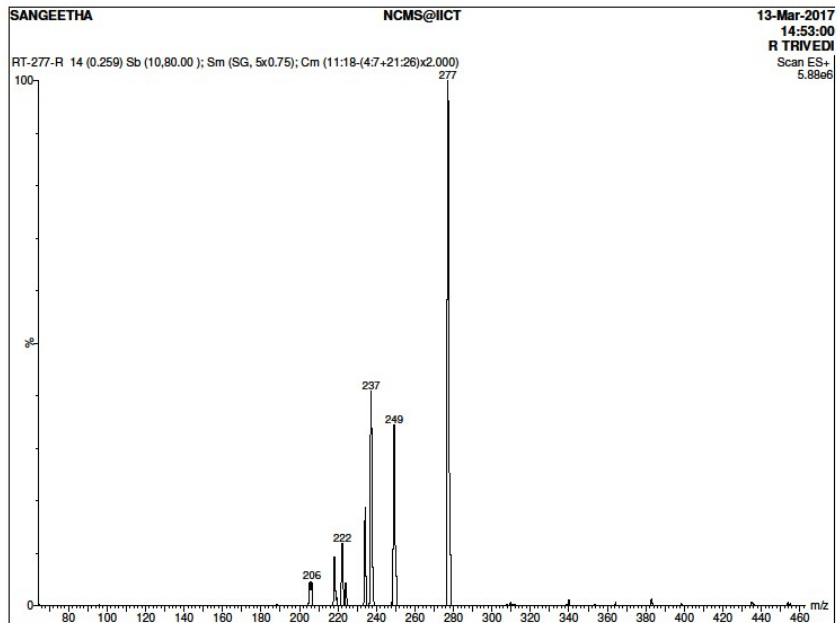

ESI/ MS Spectrum of 3bn

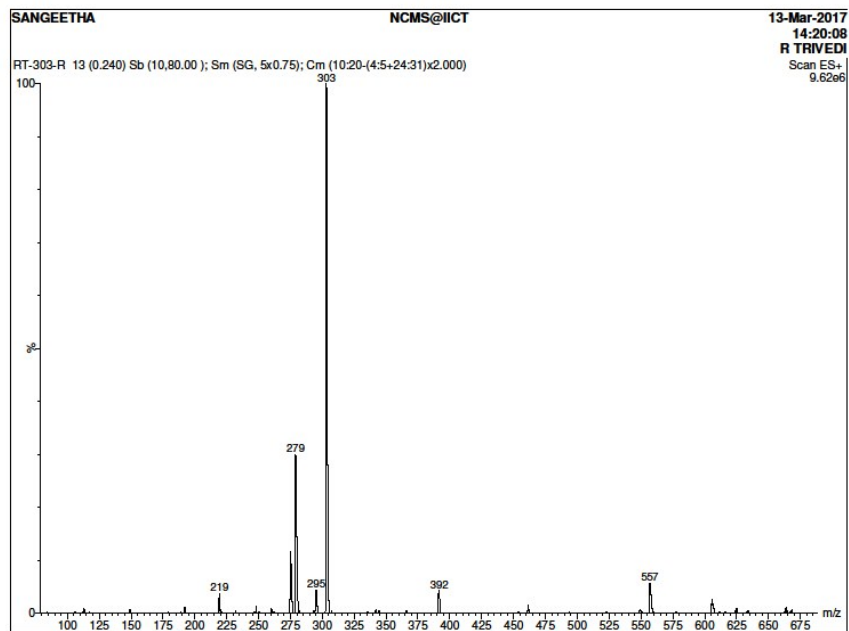

ESI/ MS Spectrum of 3bi

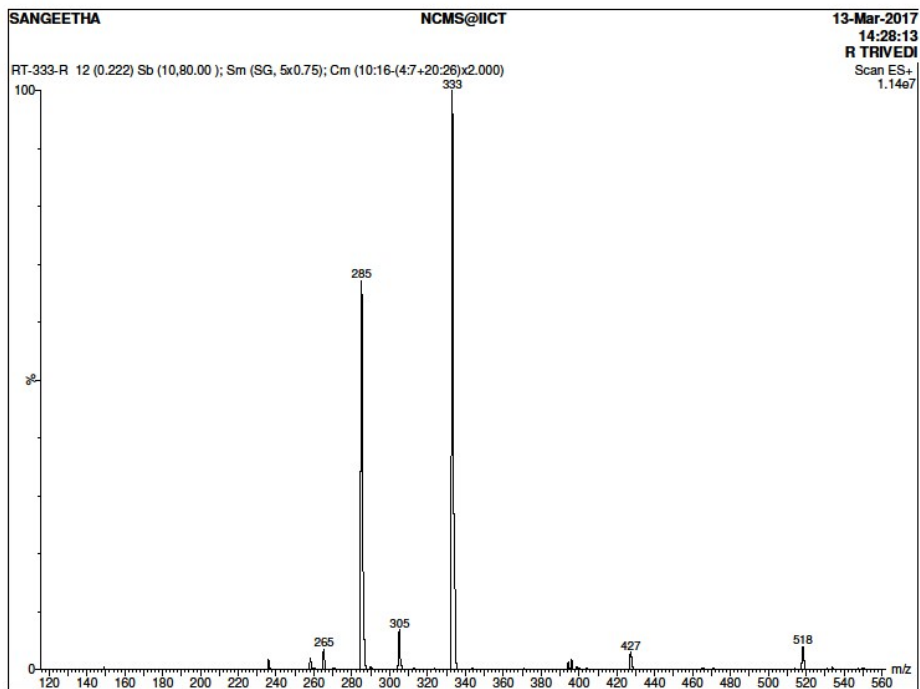

ESI/ MS Spectrum of 3a

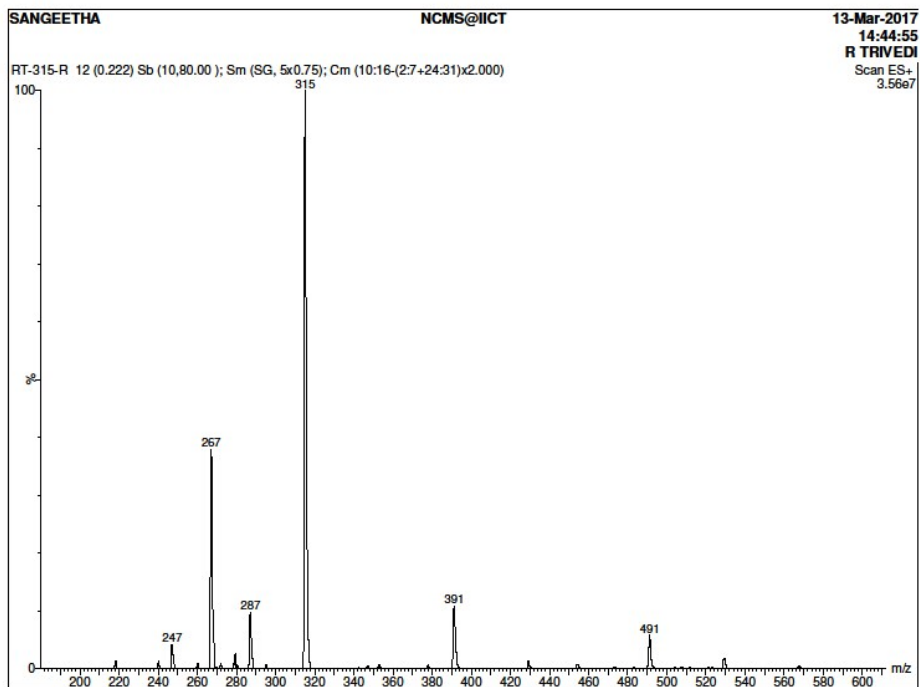

ESI/ MS Spectrum of 3b

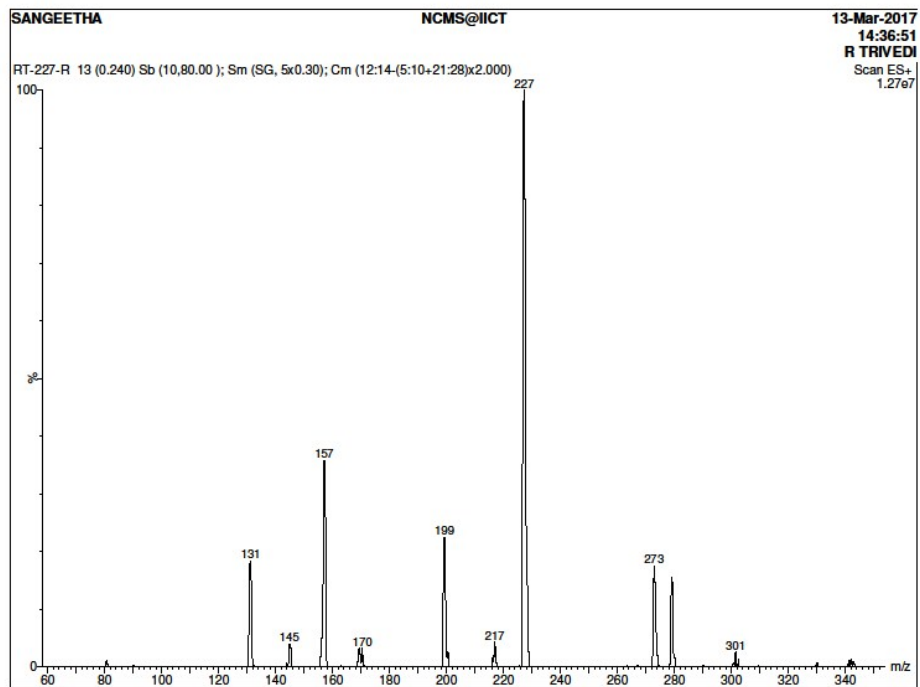

ESI/ MS Spectrum of 3cd
